## Unique Evolution of Antiviral Tetherin in Bats

Joshua A. Hayward<sup>a,b</sup>, Mary Tachedjian<sup>c</sup>, Adam Johnson<sup>a</sup>, Aaron T. Irving<sup>d,e,f</sup>, Tamsin B. Gordon<sup>a,b</sup>, Jie Cui<sup>g,h</sup>, Alexis Nicolas<sup>c</sup>, Ina Smith<sup>c</sup>, Vicky Boyd<sup>c</sup>, Glenn A. Marsh<sup>c</sup>, Michelle L. Baker<sup>c</sup>, Lin-Fa Wang<sup>f,i,j</sup>, Gilda Tachedjian<sup>a,b,j</sup>

<sup>a</sup>Health Security Program, Life Sciences Discipline, Burnet Institute, Life Sciences, Melbourne, VIC 3004, Australia; <sup>b</sup>Department of Microbiology, Monash University, Clayton, VIC 3168, Australia; <sup>c</sup>CSIRO, Australian Centre for Disease Preparedness, Health and Biosecurity Business Unit, Geelong, VIC 3220, Australia; <sup>d</sup>Zhejiang University-University of Edinburgh Institute, Zhejiang University School of Medicine, Zhejiang University International Campus, China; <sup>e</sup>Second Affiliated Hospital, Zhejiang University School of Medicine, Hangzhou, China; <sup>f</sup>Programme in Emerging Infectious Diseases, Duke-NUS Medical School, Singapore, Singapore; <sup>g</sup>CAS Key Laboratory of Molecular Virology & Immunology, Institut Pasteur of Shanghai, Chinese Academy of Sciences, China; <sup>h</sup>Center for Biosafety Mega-Science, Chinese Academy of Sciences, China; <sup>i</sup>Singhealth Duke-NUS Global Health Institute, Singapore; <sup>j</sup>Department of Microbiology and Immunology, The University of Melbourne, at The Peter Doherty Institute for Infection and Immunity, Melbourne, VIC 3000, Australia.

### Corresponding Author

Gilda Tachedjian, 85 Commercial Rd, Melbourne, 3004, +61-3-9282-2256, [gilda.tachedjian@burnet.edu.au](mailto:gilda.tachedjian@burnet.edu.au)

### Keywords

Bats; Tetherin; Restriction Factors; Innate Immunity; Antiviral; Virus

## Abstract

bioRxiv preprint doi: <https://doi.org/10.1101/2020.04.08.031203>; this version posted November 12, 2020. The copyright holder for this preprint (which was not certified by peer review) is the author/funder, who has granted bioRxiv a license to display the preprint in perpetuity. It is made available under a [CC-BY-NC-ND 4.0 International license](#).

## 1 Abstract

2 Bats are recognised as important reservoirs of viruses deadly to other mammals, including humans.  
3 These infections are typically nonpathogenic in bats raising questions about host response differences  
4 that might exist between bats and other mammals. Tetherin is a restriction factor which inhibits the  
5 release of a diverse range of viruses from host cells, including retroviruses, coronaviruses, filoviruses,  
6 and paramyxoviruses, some of which are deadly to humans and transmitted by bats. Here we  
7 characterise the tetherin genes from 27 species of bats, revealing that they have evolved under strong  
8 selective pressure, and that fruit bats and vesper bats express unique structural variants of the  
9 tetherin protein. Tetherin was widely and variably expressed across fruit bat tissue-types and  
10 upregulated in spleen tissue when stimulated with Toll-like receptor agonists. The expression of two  
11 computationally predicted splice isoforms of fruit bat tetherin was verified. We identified an  
12 additional third unique splice isoform which includes a C-terminal region that is not homologous to  
13 known mammalian tetherin variants but was functionally capable of restricting the release of filoviral  
14 particles. We also report that vesper bats possess and express at least five tetherin genes, including  
15 structural variants, a greater number than any other mammal reported to date. These findings support  
16 the hypothesis of differential antiviral gene evolution in bats relative to other mammals.

## 17 Introduction

18 Bats are reservoirs of viruses that are highly pathogenic to other mammals, including humans. Viruses  
19 such as Hendra, Nipah, Ebola, Marburg, severe acute respiratory syndrome coronaviruses (SARS-CoV-  
20 1 and likely also SARS-CoV-2), and the Sosuga virus have crossed species barriers from bats into  
21 humans (1-5). Laboratory studies demonstrate that specific bat species can be infected with Ebola,  
22 Marburg, SARS-CoV-1, Hendra, and Nipah viruses without showing clinical signs of disease (6-10).  
23 Recently, this has led to efforts to elucidate if there are differences observed between the antiviral  
24 strategies of bats and other mammals (11-19). These studies have identified that genes related to  
25 immunity in bats are under a significant degree of positive selection, in addition to differences in the  
26 copy number and diversity of innate immune genes of bats relative to other mammals (12-15, 17, 20).  
27 Tetherin (BST-2, CD317) is a mammalian restriction factor that inhibits the release of diverse  
28 enveloped viral particles from the cells in which they are produced (21-23). These viruses include  
29 retroviruses, coronaviruses, filoviruses, and paramyxoviruses, some of which are transmissible by bats  
30 (24-27). Tetherin is a membrane-associated glycoprotein and its activity is determined by its structure,  
31 rather than its primary amino acid sequence (28, 29). In addition, tetherin possesses a secondary role

## Introduction

bioRxiv preprint doi: <https://doi.org/10.1101/2020.04.08.031203>; this version posted November 12, 2020. The copyright holder for this preprint (which was not certified by peer review) is the author/funder, who has granted bioRxiv a license to display the preprint in perpetuity. It is made available under aCC-BY-NC-ND 4.0 International license.

1 in immune signalling events by triggering the NF- $\kappa$ B signalling pathway, leading to stimulation of the  
2 antiviral interferon response (30-33).

3 In humans, tetherin is expressed across most cell types, including its BST-2 namesake bone marrow  
4 stromal cells, and its expression is upregulated by stimulation with type I interferons (34-36). Tetherin  
5 is a dimeric dual-anchor type II membrane protein that contains one protein anchor, a transmembrane  
6 domain near its N-terminus, an extracellular coiled-coil domain, and a glycosphosphatidylinositol (GPI)  
7 lipid anchor, which is attached to its C-terminus as a post-translational modification (37-39). Tetherin  
8 contains a number of conserved cytosine and asparagine motifs within the extracellular domain, with  
9 respective roles in dimerisation and glycosylation, and a dual-tyrosine motif (Y·x·Y) in its cytoplasmic  
10 region, which has a role in viral particle endocytosis and immune signalling cascades (31, 40). Tetherin  
11 is located in lipid rafts at the plasma membrane where many viral particles bud during acquisition of  
12 their host membrane-derived viral envelopes (39). During the viral budding process one anchor  
13 remains embedded in the nascent viral envelope while the other remains attached to the plasma  
14 membrane, tethering the virion to the cell and preventing its release into the extracellular  
15 environment (28, 38).

16 Tetherin is common to all mammals, and orthologs which share structural and functional, but not  
17 sequence similarity, exist in other vertebrates (29). Most mammals carry only a single tetherin gene;  
18 however gene duplication has been observed in sheep, cattle, opossums and wallabies (29, 41).  
19 Furthermore, human tetherin is expressed in two alternative isoforms (30), the long (l-tetherin) and  
20 short (s-tetherin) isoforms, which differ through the truncation of 12 amino acid (AA) residues at the  
21 N-terminus of l-tetherin. Computational analysis of the genomes of megabats from the *Pteropus* genus  
22 predict two additional isoforms, X1 and X2, with an internal, rather than N-terminal difference in  
23 amino acid sequences, although whether these isoforms are expressed is unknown (12). The predicted  
24 isoform X1 is homologous to human l-tetherin, and the X2 isoform is a splice variant which contains a  
25 7 AA exclusion within the extracellular coiled-coil domain relative to isoform X1. A recent analysis of  
26 tetherin in the fruit bats *Hypsignathus monstrosus* and *Epomops buettikoferi* revealed that these  
27 species expressed a homolog of *Pteropus* isoform X1 and that it is a functional restriction factor  
28 capable of inhibiting the release of the bat-hosted Nipah virus, as well as virus-like particles (VLPs)  
29 produced from the Ebola virus and the human immunodeficiency virus (23).

30 We hypothesised that given the role of bats as hosts of pathogenic enveloped viruses, and the  
31 differences observed in other antiviral genes of their innate immune system (14), that diversity  
32 might also exist in the tetherin genes of bats. Here we report that fruit bats possess a unique  
33 structural isoform which has differential activity against viral VLPs, restricting filoviral but not

## Introduction

bioRxiv preprint doi: <https://doi.org/10.1101/2020.04.08.031203>; this version posted November 12, 2020. The copyright holder for this preprint (which was not certified by peer review) is the author/funder, who has granted bioRxiv a license to display the preprint in perpetuity. It is made available under a [CC-BY-NC-ND 4.0 International license](#).

1 retroviral VLPs, in addition to the two computational predictions, tetherin isoforms X1 and X2, which  
2 were generated through the automated NCBI annotation pipeline from the published *P. alecto*  
3 genome [NCBI: PRJNA171993] (12). We report that microbats of the suborder Yangochiroptera,  
4 genus *Myotis*, possess at least five tetherin genes, two of which contain large structural differences  
5 in the extracellular coiled-coil domain. An analysis of the tetherin genes of 27 species of bats  
6 revealed that bat tetherin has been subjected to strong positive selection, indicating that these  
7 flying mammals have experienced evolutionary pressure on this antiviral gene. Collectively our  
8 findings indicate that bats have undergone tetherin gene expansion and diversification relative to  
9 other mammals, supporting the hypothesis of differential antiviral gene evolution in bats.

## 10 Results

### 11 Bats possess structural homologs of human tetherin

12 To advance our understanding of bat tetherin homologs, we mined all available publicly accessible  
13 sequence read archives representing 26 species of bats through a BLASTn analysis (Table 1). The  
14 species analysed represent 8 of the 20 families within the order Chiroptera: three families  
15 (Hipposideridae, Pteropodidae, and Rhinolophidae) from within the suborder Yinpterochiroptera, and  
16 five families (Emballonuridae, Miniopteridae, Molossidae, Vespertilionidae, and Phyllostomidae) from  
17 within the suborder Yangochiroptera. This analysis revealed mRNA sequences representing homologs  
18 of human tetherin from 26 bat species, in addition to the homolog obtained from *P. alecto* cDNA,  
19 enabling the generation of consensus bat tetherin structural domains and amino acid sequence (Figure  
20 1A & 1C) from a multiple sequence alignment (SI Data 1). The primary sequence lengths range from  
21 177 to 221 AA, compared to 180 AA for human I-tetherin, and of these only 23 residues were  
22 conserved in 100% of the bat tetherin sequences analysed (Figure 1B). The assembled tetherin  
23 sequence for all bats was a homolog of human I-tetherin, except for the Black-bearded Tomb bat  
24 (*Taphozous melanopogon*), which was predicted to possess an equivalent of the human s-tetherin.  
25 The predicted *T. melanopogon* tetherin nucleotide sequence contains two key mutations upstream of  
26 its short isoform start site, an ATG to CTG change in the long isoform start codon, and a TAG stop  
27 codon in between the two start codon sites, either of which would be sufficient to prevent the  
28 production of the long isoform of tetherin. No nucleotide conflicts exist between the 17 reads  
29 mapping to this region of the *T. melanopogon* tetherin sequence, indicating that these mutations are  
30 unlikely to represent sequencing or consensus alignment errors.

31 The dual-tyrosine Y-x·Y motif, which is critical for mediating viral-particle endocytosis and is involved  
32 in immune signalling (31, 40), is variable among bat species and exists in different combinations of

## Results

bioRxiv preprint doi: <https://doi.org/10.1101/2020.04.08.031203>; this version posted November 12, 2020. The copyright holder for this preprint (which was not certified by peer review) is the author/funder, who has granted bioRxiv a license to display the preprint in perpetuity. It is made available under a [CC-BY-NC-ND 4.0 International license](#).

1 Y|C·x·Y|H (Figure 1A and 1C). All bat species possess at least one tyrosine residue within this motif  
2 (Figure 1C). Conservation of the protein domain organization and key structural motifs of bat tetherin,  
3 despite significant amino acid sequence diversity, supports the present understanding of tetherin as  
4 a protein whose functions are mediated through structural rather than sequence-mediated  
5 interactions (28).

### 6 Bat tetherin genes are under significant positive selection

7 To assess the evolutionary pressure applied during the speciation of bats, a selection test was  
8 performed to analyse bat tetherin genes spanning to ~65 million years ago (mya) of Chiropteran  
9 history. The analysis revealed that overall, bat tetherin genes have been subjected to positive  
10 selection, with an average ratio of non-synonymous (dN) to synonymous (dS) mutations, dN/dS, of  
11 1.125 over the Chiropteran phylogeny, with numerous specific positions subjected to a large degree  
12 of positive selection, with dN/dS values of 2.626 - 2.668 (Table 2). These sites are predominantly  
13 located in the transmembrane domain and the regions of the cytoplasmic and extracellular domains  
14 immediately adjacent to the transmembrane domain (Figure 1A). This analysis suggests the presence  
15 of evolutionary pressure exerted on tetherin, by viral antagonists or countermeasures that target  
16 residues within tetherin, following the speciation of the Chiropteran order. The apparent ubiquity of  
17 tetherin among bats, in concert with significant sequence diversity and evidence of strong positive  
18 selection pressures operating on each species, supports the notion that tetherin plays a major role in  
19 the antiviral repertoire of bats.

### 20 Fruit bats possess unique structural isoforms of the tetherin protein generated 21 through alternative splicing of a single tetherin gene

22 The expression of the fruit bat tetherin gene was initially assessed by a BLASTn search within the  
23 transcriptome of an Australian fruit bat, the Black flying fox, *Pteropus alecto*, using the human tetherin  
24 amino acid sequence as the search query. We identified 30 contigs matching the query (lowest E-value  
25 =  $9.21 \times 10^{-23}$ ). A single *P. alecto* homolog of tetherin, herein described as isoform A, homologous to  
26 human I-tetherin and the predicted X1 isoform (GenBank: XM\_006904279), was identified. *P. alecto*  
27 tetherin isoform A has low primary amino acid sequence conservation (37%) compared to human I-  
28 tetherin (Figure 2A) and other mammalian (28 - 47%) tetherin sequences homologous to human I-  
29 tetherin (Figure 2B). Despite the low amino acid sequence identity, the predicted secondary structures  
30 and protein domains are largely conserved between bats and other mammals (Figure 2B). All tetherin  
31 proteins containing the cytoplasmic (CD), transmembrane (TM), extracellular domains (ED), and the

## Results

bioRxiv preprint doi: <https://doi.org/10.1101/2020.04.08.031203>; this version posted November 12, 2020. The copyright holder for this preprint (which was not certified by peer review) is the author/funder, who has granted bioRxiv a license to display the preprint in perpetuity. It is made available under aCC-BY-NC-ND 4.0 International license.

1 post-translationally cleaved GPI-anchor signal peptide (GSP) with the exception of sheep tetherin B,  
2 which does not contain the GSP domain.

3 To verify the expression of bat tetherin isoform A, a cDNA library was prepared from *P. alecto* spleen  
4 tissue, comprising several immune cell types, and assessed for the presence of transcripts matching  
5 that identified in the *P. alecto* transcriptome. Primers were designed to flank the open reading frame  
6 of tetherin isoform A, and amplicons were generated by PCR. Amplicons were then cloned into  
7 plasmid vectors for DNA sequencing. This analysis revealed two additional isoforms of tetherin,  
8 isoforms B & C. Isoform B was homologous to the computationally predicted isoform X2 (GenBank:  
9 XM\_015587122). Both isoforms B and C were predicted to contain structural differences relative to  
10 isoform A. They both possess a 7 AA exclusion in the middle of the extracellular domain while isoform  
11 C was additionally predicted to contain an alternative C-terminus, without the GSP domain (Figure  
12 2B). The absence of a GSP domain suggests that it is unlikely that parallel homodimers of isoform C  
13 would possess the capacity to tether viral particles to the cell.

14 Mapping the tetherin cDNA sequences against the *P. alecto* genome identified a single tetherin gene  
15 located on Scaffold KB030270 (Figure 3A), between the MVB12A (multivesicular body subunit 12A)  
16 and PLVAP (plasmalemma vesicle associated protein) genes, similar to the human tetherin gene  
17 (Viewable in the Ensembl genome browser:  
18 [http://www.ensembl.org/Homo\\_sapiens/Location/View?db=core;g=ENSG00000130303;r=19:17402](http://www.ensembl.org/Homo_sapiens/Location/View?db=core;g=ENSG00000130303;r=19:17402886-17405683)  
19 [886-17405683](http://www.ensembl.org/Homo_sapiens/Location/View?db=core;g=ENSG00000130303;r=19:17402886-17405683)). *P. alecto* Isoform B and C mRNA are generated from the use of an alternative splice  
20 acceptor site for the first intron, resulting in the 7 AA exclusion, while the distinct C-terminus of  
21 isoform C is a result of alternative mRNA splicing that incorporates exon 5 while excluding exon 4 used  
22 in isoform A and B (Figure 3B).

### 23 Vesper bats possess multiple tetherin genes that contain unique structural 24 variations

25 To further investigate the diversity of tetherin in non-fruit bat species, we amplified the tetherin  
26 nucleotide sequences for the vesper bat species *Myotis ricketti* and *Miniopterus schreibersii* using  
27 primers designed on the basis of the transcriptome sequences (Table 3A). These primers were used  
28 for PCR of cDNA samples generated from *M. ricketti* spleen tissue and a *M. schreibersii* kidney cell line  
29 to amplify the tetherin coding domain sequences (Table 3A). Primers for *M. ricketti* were also used to  
30 amplify the tetherin coding region from cDNA generated from a *Myotis macropus* kidney cell line as it  
31 was reasoned that since these species belong to the same genus, primers designed for one might be  
32 capable of amplifying tetherin from the other. Following PCR, amplified DNA from *M. ricketti*,  
33 *M. macropus*, and *M. schreibersii*, were gel purified, cloned and sequenced.

## Results

bioRxiv preprint doi: <https://doi.org/10.1101/2020.04.08.031203>; this version posted November 12, 2020. The copyright holder for this preprint (which was not certified by peer review) is the author/funder, who has granted bioRxiv a license to display the preprint in perpetuity. It is made available under aCC-BY-NC-ND 4.0 International license.

1 These microbats were found to express various homologs of tetherin that include encoding of unique  
2 structural variations (Figure 4A and 4B). The tetherin homolog of human I-tetherin, predicted for *M.*  
3 *schreibersii*, was detected (Figure 4A). Five unique tetherin variants, differing in their encoded amino  
4 acid sequences (tetherin A – E), were identified for *M. macropus*, two of which, tetherin A and B, were  
5 also detected in *M. ricketti* (Figure 4A). These tetherin variants encode three distinct homologs  
6 (tetherin A, C, D) of the human I-tetherin, sharing the same protein domains but differing in their  
7 amino acid sequence (Figure 4B). Pairwise comparisons (Figure 5) reveal that the tetherin variants of  
8 *M. macropus* share between 84.2 – 92.0% amino acid sequence identity with each other, along with  
9 44.6 – 53.5% identity with *P. alecto* tetherin isoform A, and 37.5 – 43.5% identity with human  
10 I-tetherin. The *M. ricketti* tetherin A and B share 100% amino acid sequence identity with their  
11 *M. macropus* counterparts. The tetherin of *M. schreibersii* shares between 34.6 and 49.7% sequence  
12 identity across all pairs.

13 An additional splice variant (isoform B) of *M. macropus* tetherin C was also identified. *M. macropus*  
14 tetherin C isoform B is predicted to have a C-terminal truncation and possesses only the cytoplasmic  
15 domain, transmembrane domain, and less than half of the extracellular domain (Figure 4B).  
16 Accordingly, it is predicted to lack the GPI signal peptide required for the post-translational addition  
17 of a GPI-anchor, also found for *P. alecto* tetherin isoform C (Figure 2B). The absence of a GPI anchor  
18 indicates that it is unlikely that homodimers of *M. macropus* tetherin C isoform B would possess the  
19 capacity to tether viral particles to the cell. *M. macropus* tetherin B and E were found to be structurally  
20 unique, possessing a large deletion of ~60 amino acids in the extracellular coiled-coil domain (Figure  
21 4B), compared to the other tetherin homologs, which has been shown to be critical for viral particle  
22 restriction (28, 42). This deletion results in the exclusion of the conserved disulphide bond-forming  
23 cysteine residues, and the conserved asparagine-linked glycosylation sites, indicating that this form of  
24 tetherin is unlikely to form dimers or be glycosylated in the manner of human tetherin (28, 43). They  
25 are however predicted to possess all other tetherin domains including the transmembrane domain  
26 and GPI signal peptide, indicating that they may still be capable of tethering viral particles. *M.*  
27 *macropus* tetherin B and E share 92.1% amino acid sequence identity indicating they are the product  
28 of a relatively recent gene duplication (Figure 5).

29 While there is no available genome for *M. macropus*, the most closely related publicly accessible  
30 genome assemblies are for the relatively distantly related *Myotis lucifugus* and *M. davidii*, which  
31 diverged from *M. macropus* approximately 19 and 14 mya, respectively (44). For comparison, humans  
32 and chimpanzees diverged approximately 6.5 mya (45). A BLASTn analysis of the *M. macropus* tetherin  
33 nucleotide sequences against the *M. davidii* and *M. lucifugus* genomes revealed first that both species  
34 were too distantly related to *M. macropus* to match each *M. macropus* gene product specific to *M.*

## Results

bioRxiv preprint doi: <https://doi.org/10.1101/2020.04.08.031203>; this version posted November 12, 2020. The copyright holder for this preprint (which was not certified by peer review) is the author/funder, who has granted bioRxiv a license to display the preprint in perpetuity. It is made available under aCC-BY-NC-ND 4.0 International license.

1 *dauidii* or *M. lucifugus* gene regions. However, the *M. lucifugus* genome assembly included a single  
2 gene scaffold (GL430608) which contained matches to all query *M. macropus* tetherin sequences,  
3 comprising seven potential *M. lucifugus* tetherin genes (Figure 6A) and indicating the presence of a  
4 tetherin gene locus within this scaffold. Further analysis of the mapped exons, as described below,  
5 enabled confirmation of the *M. lucifugus* tetherin regions. The *M. lucifugus* tetherin gene locus was  
6 located between the MVB12A and PLVAP genes, as observed for the single *P. alecto* tetherin gene  
7 (Figures 3 and 6).

8 The genome assembly of *M. dauidii* also contained significant matches to *M. macropus* tetherin  
9 sequences, however these were spread across seven different gene scaffolds against which no *M.*  
10 *macropus* tetherin coding domain sequence could be matched in its entirety. For this reason, further  
11 genomic analysis of *Myotis* tetherin genes was confined to the *M. lucifugus* genome.

12 The *M. lucifugus* tetherin gene locus (Figure 6A) contains seven potential genes that are defined by  
13 the presence of two or more exons mapping to the *M. macropus* tetherin cDNA. Three exons across  
14 tetherin gene regions 1, 2, and 6, possess all of the coding exons required to express homologs to *M.*  
15 *macropus* tetherin A, C, and D (Figure 6B). Furthermore, *M. lucifugus* tetherin gene regions 2, and 3  
16 possess all of the coding exons required to produce homologs to *M. macropus* tetherin B and E (Figure  
17 6C). These data indicate that microbats of the genus *Myotis* possess a greater number and diversity  
18 of tetherin genes than any mammal reported to date.

19 These findings expand upon a recent report by Hölzer and colleagues (18), that identified the  
20 expression of three tetherin paralogs, upregulated by interferon treatment, in the vesper bat, *M.*  
21 *daubentonii*. Mapping of these paralogs against the genome of *M. lucifugus* revealed four tetherin  
22 genes, currently listed as novel gene predictions within the Ensembl database:  
23 ENSMLUG00000023691, ENSMLUG00000029243, ENSMLUG00000026989, and  
24 ENSMLUG00000023562 (18). Herein these genes are labelled Tetherin 1, 2, 6, and 7, respectively  
25 (Figure 6A).

### 26 Tetherin expression pattern in *P. alecto* tissue samples

27 Tetherin is widely and variably expressed across human tissues and is upregulated in response to  
28 interferon (35, 36). To assess the relative expression of bat tetherin across different tissue types, tissue  
29 samples were obtained from three individual *P. alecto* bats: a male, a pregnant female, and a juvenile  
30 male. Using primers that amplify all three isoforms of *P. alecto* tetherin, expression was analysed by  
31 qPCR with Ct values normalised against the 18S rRNA housekeeping gene (Figure 7). The two male  
32 bats exhibited similar tetherin expression patterns, with greatest levels in the thymus. A thymus tissue  
33 sample was not obtained from the female, although a similar pattern to the male bats was observed



## Results

bioRxiv preprint doi: <https://doi.org/10.1101/2020.04.08.031203>; this version posted November 12, 2020. The copyright holder for this preprint (which was not certified by peer review) is the author/funder, who has granted bioRxiv a license to display the preprint in perpetuity. It is made available under aCC-BY-NC-ND 4.0 International license.

1 among most other tissues. The female bat had higher expression in the lung compared to the male  
2 bats, possibly reflecting an active response to a respiratory infection, an artefact of hormonal  
3 regulation, or natural heterogeneity between bats.

4 Previous studies in vesper bats, have demonstrated that tetherin is upregulated in response to type I  
5 interferon alpha stimulation (18). To determine if pathogen-mediated stimulation can upregulate  
6 tetherin expression in fruit bats we analysed the transcriptome of *P. alecto* spleen tissue from animals  
7 treated *in vivo* with the Toll-like receptor (TLR) agonists, lipopolysaccharide (LPS) or  
8 polyinosinic:polycytidylic acid (PIC). In *P. alecto*, LPS treatment increases the percentage of B-cells in  
9 the spleen (46), and PIC treatment was observed to increase the expression of the interferon-  
10 stimulated gene, *ISG54* (47). We found that *P. alecto* tetherin was significantly upregulated by LPS (P  
11 = 0.028) and PIC (P = 0.004) (Figure 8).

12 We next assessed if there was a difference in the expression of the alternative tetherin isoforms A, B  
13 and C. This analysis revealed that tetherin is predominantly expressed as isoform B (14/15 samples;  
14 Figure 9A & 9B) while stimulation with LPS significantly increased the expression of Isoform A (P =  
15 0.048), but not Isoform B or C. Stimulation with PIC increased the expression of isoform A and B  
16 compared to unstimulated tissue; however this effect was variable among individual bat spleen  
17 samples and did not reach significance. Expression of Isoform C was only observed in a single PIC  
18 treated spleen sample. These data show that tetherin isoforms are expressed in tissue and can be  
19 upregulated by stimulation with TLR-agonists.

### 20 *P. alecto* tetherin protein expression and cellular localisation

21 To characterise bat tetherin, we analysed tetherin from two Australian bats, the fruit bat *P. alecto* and  
22 the vesper bat *M. macropus*. The coding sequences of the *P. alecto* tetherin isoforms A, B, and C, and  
23 *M. macropus* tetherin A and B, were cloned into mammalian expression plasmids. While numerous  
24 vesper bat tetherins were identified in this study, *M. macropus* tetherin A and tetherin B were selected  
25 for further analysis as tetherin A is a homolog of human I-tetherin and tetherin B was the most  
26 structurally unique, possessing a large deletion within the extracellular coiled-coil domain compared  
27 to tetherin A (Figure 4B).

28 All tetherin coding sequences were modified with the addition of a haemagglutinin (HA) tag sequence  
29 (N-SGYPYDVPDYAGS-C) to enable antibody-based detection of protein expression. In all cases the HA  
30 tag was inserted at the position immediately following the end of the coiled-coil region of the  
31 extracellular domain (Figure 1A) which is the equivalent location to that previously utilised in the  
32 tagging of human tetherin (28).

## Results

bioRxiv preprint doi: <https://doi.org/10.1101/2020.04.08.031203>; this version posted November 12, 2020. The copyright holder for this preprint (which was not certified by peer review) is the author/funder, who has granted bioRxiv a license to display the preprint in perpetuity. It is made available under aCC-BY-NC-ND 4.0 International license.

1 To evaluate tetherin protein expression, mammalian HEK293T cells, which do not express tetherin in  
2 the absence of type I interferon stimulation (21), were transfected with bat tetherin expression  
3 constructs. Cell lysates were extracted using a method for enhanced extraction of GPI-anchored  
4 proteins (48) and tetherin expression was observed by non-reducing SDS-PAGE and Western blot  
5 analysis (Figure 10).

6 *P. alecto* tetherin isoforms A and B were detected primarily as broad bands at the expected positions  
7 ~56-75 kDa while isoform C was present as both dimers and predominantly, monomers (~32-35 kDa)  
8 (Figure 10A). The presence of broad/multiple bands in close proximity to each other likely reflects  
9 variable levels of tetherin glycosylation as previously reported for human tetherin (28). *M. macropus*  
10 tetherin A was also detected as a dimer at the expected size of ~55 kDa while tetherin B was only  
11 detected as a monomer with a size of ~26 kDa (Figure 10B). Bat tetherin that are homologous to  
12 human I-tetherin dimerised as expected, while the structurally unique tetherin proteins behaved  
13 differently. In this regard, *P. alecto* tetherin isoform C formed both dimers and monomers, while *M.*  
14 *macropus* tetherin B was detected exclusively as a monomer. These data show that HA-tagged  
15 tetherin can be expressed and that these proteins differ in their ability to dimerise.

16 Human tetherin localises to the plasma membrane at sites of virus budding, in addition to membranes  
17 of the trans-Golgi network and recycling compartments (21, 49). To determine localisation of *P. alecto*  
18 tetherin isoforms, HEK293T cells were transfected with constructs expressing HA-tagged tetherin that  
19 was visualised by immunofluorescence. *P. alecto* tetherin isoform A localised to the plasma  
20 membrane, displaying a similar cellular localisation pattern as human tetherin (Figure 11A and 11C),  
21 while isoform C was predominantly localised in the cytoplasm (Figure 11E). *P. alecto* tetherin isoform  
22 B demonstrated a fluorescence pattern with features shared by both isoforms A and C (Figure 11D).  
23 These data show that bat tetherin isoforms can be expressed with isoforms A and B, but not C  
24 predominately localising at the plasma membrane.

### 25 *P. alecto* and *M. macropus* tetherin proteins display distinct ability to restrict 26 HIVΔVpu virus-like particles

27 Tetherin from humans and other mammals including cats, sheep, and other bat species (*Hypsignathus*  
28 *monstrosus* and *Epomops buettikoferi*) restrict the release of HIV-1 VLPs from cells (23, 50, 51). To  
29 examine if tetherin from *P. alecto* and *M. macropus* function to similarly block viral particle release,  
30 we assessed their ability to restrict HIV-1 VLPs. HEK293T cells were co-transfected with constructs  
31 expressing bat tetherin and HIVΔVpu VLPs, that do not express Vpu, an antagonist of human tetherin  
32 (21). *P. alecto* tetherin isoforms A and B inhibited the release of HIVΔVpu VLPs in contrast to tetherin  
33 isoform C which failed to block VLP release (Figure 12A). *M. macropus* tetherin A also restricted

## Results

bioRxiv preprint doi: <https://doi.org/10.1101/2020.04.08.031203>; this version posted November 12, 2020. The copyright holder for this preprint (which was not certified by peer review) is the author/funder, who has granted bioRxiv a license to display the preprint in perpetuity. It is made available under aCC-BY-NC-ND 4.0 International license.

1 HIVΔVpu VLP release from HEK293T cells, however tetherin B was unable to inhibit HIVΔVpu VLP  
2 egress (Figure 12B). These data indicate that, with the exception of *P. alecto* tetherin isoform C and  
3 *M. macropus* tetherin B, tagged bat tetherin proteins are functionally capable of restricting the release  
4 of HIV-1 particles from mammalian cells in the absence of Vpu.

### 5 The structurally unique *P. alecto* tetherin isoform C restricts the release of filoviral 6 virus-like particles

7 We next investigated whether *P. alecto* tetherin isomers are able to restrict filovirus VLPs, including  
8 isoform C, which contains a unique C-terminal domain compared to isomers A and B (Figure 2B). In  
9 contrast to experiments with HIV-1 VLP, tetherin isoform C was able to restrict the release of VLPs  
10 composed of Ebola and Marburg virus VP40 matrix proteins ( $P = 0.008$  for both; Figure 13A & 13B).  
11 Ebola VLPs were restricted by isoforms A, B, and C to similar extents (Figure 13A), while Marburg VLPs  
12 were restricted by isoform C to a lesser extent than isoforms A and B (Figure 13B). These data  
13 demonstrate that all *P. alecto* isomers were able to restrict filoviral VLPs including isomer C which  
14 lacks the GSP domain.

## 15 Discussion

16 Bats are increasingly being recognised as hosts of viruses with zoonotic potential, driving efforts to  
17 better understand these host-virus relationships and the evolutionary features of bats that  
18 differentiate them from other mammals (14, 17, 52, 53). It has been hypothesised that the  
19 evolutionary adaptation to flight, including changes to the DNA damage response, increased  
20 metabolic rates, and higher body temperatures, have influenced the immune system of bats in such a  
21 way as to make them ideal hosts for viruses (12, 54, 55). To determine the differences between the  
22 innate antiviral defences of bats relative to other mammals, we analysed the genes and expressed  
23 transcripts of tetherin from diverse bat genera and species within the order Chiroptera. We found  
24 that in all but one species, bats possess genes that express transcripts encoding a tetherin protein  
25 homologous to the long isoform of human tetherin (l-tetherin). In addition, we found that *P. alecto*  
26 expresses three isoforms from a single tetherin gene, and that vesper bats (genus *Myotis*) encode five,  
27 and possibly as many as seven, distinct tetherin genes.

28 The one bat species that lacked the human l-tetherin homolog, *T. melanopogon*, possessed an  
29 equivalent of the short isoform of human tetherin (s-tetherin), an observation also reported for cats  
30 (56). In a study of feline tetherin, short isoform-exclusivity was found to improve viral restriction and  
31 decrease sensitivity to tetherin antagonism by HIV-1 Vpu when compared to an engineered long  
32 isoform version of feline tetherin (56). Conversely, the feline immunodeficiency virus (FIV), which is

## Discussion

bioRxiv preprint doi: <https://doi.org/10.1101/2020.04.08.031203>; this version posted November 12, 2020. The copyright holder for this preprint (which was not certified by peer review) is the author/funder, who has granted bioRxiv a license to display the preprint in perpetuity. It is made available under aCC-BY-NC-ND 4.0 International license.

1 adapted to the feline host, is not restricted by either long or short isoforms of feline tetherin (56). In  
2 humans, l-tetherin acts as a virus sensor which induces NF- $\kappa$ B signalling in contrast to s-tetherin, which  
3 lacks the dual tyrosine motif required for eliciting this innate immune response (30, 31). The findings  
4 presented here suggest that if bat tetherin proteins are confirmed to similarly mediate cytoplasmic  
5 domain-mediated immune signalling, then *T. melanopogon*, which only encodes a homolog of  
6 s-tetherin, would be predicted not to mediate this effect.

7 Bat tetherin amino acid sequences were found to be highly variable. The predicted protein lengths  
8 range from 177 to 221 AA (human l-tetherin is 180 AA) and of these, only 23 amino acid residues were  
9 conserved in 100% of the 27 bat tetherin sequences analysed (Figure 1B). Among these are the  
10 structurally important cysteine and asparagine residues which are responsible for tetherin  
11 dimerisation and glycosylation, respectively (57, 58). The dual-tyrosine motif, responsible for  
12 mediating viral particle endocytosis and immune signalling (31, 40), was found to exist as a variable  
13 Y|C·x·Y|H motif across the bat tetherin variants analysed. All bats maintained at least one of the two  
14 tyrosine residues. This observation is significant because mutational studies of human tetherin have  
15 demonstrated that the dual tyrosines provide redundancy for both the endocytic and signalling  
16 activities, which are maintained as long as either tyrosine is present (31, 40).

17 To understand the evolutionary selective pressures on tetherin genes across bat species, a selection  
18 test was performed that revealed that bat tetherin genes are under strong positive selection with  
19 amino acid positions in and around the transmembrane domain being the region under the strongest  
20 selective pressure (Table 2 and Figure 1A). This is in agreement with previous reports that primate  
21 tetherin possess multiple sites under positive selection in this same region (28). The driver of positive  
22 selection in the case of primate tetherin is antagonism by viral counter-measures including HIV-1 Vpu  
23 (59). Venkatesh et al. (60) demonstrated that the configuration that tetherin dimers adopt during  
24 viral particle retention primarily consists of the GPI-anchor being embedded in the viral envelope and  
25 the transmembrane domain remaining attached to the cellular membrane. If this paradigm holds true  
26 for bat tetherin, then it follows that the tetherin-cell membrane interface is the major site of tetherin  
27 antagonism in bats and it would be reasonable to speculate that the drivers of this selection are viral  
28 antagonists analogous in the mode of interaction, if not structure or function, to lentiviral tetherin  
29 antagonists.

30 We amplified tetherin from spleen-derived cDNA of an Australian fruit bat, *P. alecto*, and confirmed  
31 the expression of the two computationally predicted splice variants (isoforms A [X1] and B [X2]), and  
32 additionally identified the expression of a third isoform of tetherin, isoform C. Mapped against the *P.*  
33 *alecto* genome, all three isoforms were derived from the alternative splicing of a single tetherin gene

## Discussion

bioRxiv preprint doi: <https://doi.org/10.1101/2020.04.08.031203>; this version posted November 12, 2020. The copyright holder for this preprint (which was not certified by peer review) is the author/funder, who has granted bioRxiv a license to display the preprint in perpetuity. It is made available under aCC-BY-NC-ND 4.0 International license.

1 (Figure 3B). *P. alecto* tetherin isoform B possesses a 7 AA exclusion within the extracellular coiled-coil  
2 domain relative to isoform A, while isoform C is predicted to harbour the same 7 AA exclusion and an  
3 alternative C-terminus, that lacks the GSP domain predicted to be present in tetherin isoforms A and  
4 B which is necessary for the post-translational addition of the GPI-anchor. This is important because  
5 studies of human tetherin have demonstrated that the presence of a GPI-anchor is essential for  
6 restricting the release of viral particles (28, 42). Sheep and cows possess a duplication of the tetherin  
7 gene (41, 51). In sheep, the duplicate tetherin, named tetherin B, similarly does not encode a GSP, and  
8 studies of sheep tetherin B function reveal that while it is capable of limited restriction of VLPs, it is  
9 significantly less potent than sheep tetherin A (51). The mechanism of its function is unknown and its  
10 C-terminal amino acid sequence is entirely dissimilar from that of *P. alecto* tetherin isoform C. One  
11 possible function of additional isoforms of tetherin is to expand the viral target range of bats by  
12 undefined mechanisms that are active in the absence of a GPI anchor.

13 Intriguingly, one of the non-transmembrane domain-associated sites under strong positive selection  
14 across tetherin from bats is located in the middle of the extracellular domain. This is the site that  
15 distinguishes the *P. alecto* tetherin isoforms A and B, with the 7 AA exclusion at this location in isoform  
16 B. This suggests that the expression of *P. alecto* tetherin isoform B, and possibly also *M. macropus*  
17 tetherin B and E, which differ from tetherin A through a large 60 AA deletion in the same region, is to  
18 express a tetherin variant lacking sequence motif that appears to be a possible site of viral antagonism.  
19 This hypothesis could be supported by future experiments aimed at identifying viral antagonists of *P.*  
20 *alecto* tetherin isoform A that are ineffective against isoform B.

21 We found that the microbat *M. macropus* expresses five different tetherin genes, tetherin A, B, C, D  
22 and E, of which three (tetherin A, C, and D), encode homologs of human I-tetherin, while *M. macropus*  
23 tetherin B and E possess a large 60 AA deletion within the extracellular coiled-coil domain (Figure 4).  
24 Mapping of these genes against the genome assembly of the relatively distantly related *M. lucifugus*  
25 indicates that vesper bats of the genus *Myotis* may possess as many as seven tetherin genes (Figure  
26 6). The presence of multiple tetherin genes suggests that these bats have expanded and diversified  
27 their use of these antiviral restriction factors relative to other mammals, supporting the hypothesis of  
28 differential antiviral gene evolution in bats.

29 Tetherin was expressed widely and variably across the tissues of *P. alecto*, which is consistent with  
30 previous observations of human tetherin (36). We observed the highest levels of *P. alecto* tetherin  
31 expression in the thymus, possibly reflecting the role of the thymus in expressing a large proportion  
32 of the proteome due to its role in central tolerance. High levels of expression were also observed in  
33 lung tissue, particularly in the lung of an individual female bat. This may reflect a frontline defensive  
34 role of tetherin in the lung against enveloped viruses that are respiratory pathogens.

## Discussion

bioRxiv preprint doi: <https://doi.org/10.1101/2020.04.08.031203>; this version posted November 12, 2020. The copyright holder for this preprint (which was not certified by peer review) is the author/funder, who has granted bioRxiv a license to display the preprint in perpetuity. It is made available under aCC-BY-NC-ND 4.0 International license.

1 Tetherin was upregulated in spleen tissue treated with TLR agonists LPS and PIC. Interestingly, we  
2 observed that the expression of isoforms A, B, and C was highly variable among individual spleen  
3 samples. In several spleens, only isoform B was expressed, while in one spleen treated with PIC the  
4 vast majority of expression was attributed to isoform A. The remainder expressed variable levels of  
5 each isoform A and B, with the majority of expression trending toward isoform B. Surprisingly, isoform  
6 C was only expressed, at a low level, in a single spleen sample that had been treated with PIC. The  
7 biological importance of this observation is not presently known. Ongoing assessments of bat tetherin  
8 expression should determine if this strong bias in alternative isoform expression is present in other  
9 tissues, such as the thymus and lung.

10 The expression of the *P. alecto* tetherin isoforms A, B, and C, and *M. macropus* tetherin A and B, reveals  
11 differences in their relative capacities to form homodimers under our assay conditions (Figure 10).  
12 This observation is notable because the ability of tetherin to form cysteine-linked dimers is required  
13 for the restriction of HIV-1 viral particles (58) which we chose as the VLPs against which bat tetherin  
14 proteins were functionally validated for inhibiting viral particle release. In contrast to restriction of  
15 HIV-1, tetherin dimerisation is not required for the restriction of arenaviruses and filoviruses (61),  
16 suggesting that the need for dimerisation is virus-dependent.

17 The *P. alecto* tetherin isoforms A and B, and *M. macropus* tetherin A, that were most similar to human  
18 I-tetherin, were all found to predominantly form dimers. This was determined by non-reducing SDS-  
19 PAGE and Western blot analysis where bands were observed almost exclusively at the expected size  
20 of tetherin dimers (Figure 10). In contrast, *P. alecto* tetherin isoform C was present as both dimeric  
21 and monomeric forms (Figure 10A). The presence of monomeric forms is surprising because *P. alecto*  
22 tetherin isoform C contains all of the conserved cysteine residues and the same extracellular coiled-  
23 coil domain as isoforms A and B. The distinct C-terminal region in isoform C is the result of an  
24 alternative splicing event that also causes the loss of the final three amino acid residues of the coiled-  
25 coil region possessed by isoforms A and B. Additionally, the inserted HA tag is located in the position  
26 immediately following the coiled-coil domain. It is possible that the absence of the three terminal  
27 amino acid residues in the coiled-coil domain of isoform C relative to isoform A and B accounts for the  
28 difference in relative extents of dimerisation. Alternatively, the observed extent of dimerisation of  
29 isoform C may be an artefact of the method used to process the samples for analysis and may not be  
30 reflective of the extent of dimerisation *in situ*. It is also important to note that we cannot currently  
31 rule out the possibility that the insertion of the HA tag in between the coiled-coil domain and the  
32 alternative C-terminal sequence might be responsible for the observed reduction in dimerisation. *M.*  
33 *macropus* tetherin B was observed exclusively as a monomer (Figure 10B). The monomeric exclusivity  
34 of *M. macropus* tetherin B can be explained by the loss of all conserved cysteine residues necessary

## Discussion

bioRxiv preprint doi: <https://doi.org/10.1101/2020.04.08.031203>; this version posted November 12, 2020. The copyright holder for this preprint (which was not certified by peer review) is the author/funder, who has granted bioRxiv a license to display the preprint in perpetuity. It is made available under aCC-BY-NC-ND 4.0 International license.

1 for dimerisation within the 60 AA deletion in the extracellular coiled-coil domain of tetherin B (Figure  
2 4).

3 Given the differing extent of homodimer formation for each bat tetherin and reports that dimerisation  
4 is important for the restriction of some viruses and not required for others (58, 61), it is likely that  
5 these differences might affect the extent by which each tetherin is capable of restricting various VLPs.  
6 Tetherin function was validated through an assessment of the capacity of *P. alecto* tetherin isoforms  
7 A, B, and C, and *M. macropus* tetherins A and B to restrict the release of HIVΔVpu VLPs. While primate  
8 lentiviruses are not known to natively infect bats, bats have recently been discovered to host extant  
9 gammaretroviruses and deltaretroviruses, and bat genomes contain diverse endogenous retroviral  
10 sequences (27, 62-65). *P. alecto* tetherin isoforms A and B inhibited the release of HIVΔVpu VLPs, in  
11 contrast to isoform C which lacked restriction activity (Figure 7A). *M. macropus* tetherin A restricted  
12 HIVΔVpu VLP release, while tetherin B did not (Figure 7B). These findings are consistent with the  
13 expected effects of tetherin dimerisation on the restriction of HIVΔVpu VLPs (58).

14 Previous reports on the necessity of the tetherin GPI anchor for inhibition of viral particle release (28,  
15 42) indicates that the lack of a GPI anchor on isoform C would likely result in an inability to inhibit viral  
16 egress from the host cell. However, sheep tetherin B, which does not possess a GPI-signal peptide  
17 (Figure 2B), is capable of limited restriction of betaretroviral VLPs through an unknown mechanism  
18 (51). Because of the unique sequence of the C-terminus and lack of GSP in *P. alecto* tetherin isoform  
19 C, we extended our evaluation of its restrictive capacity to include filoviral VLPs derived from Ebola  
20 and Marburg virus VP40 matrix proteins. Surprisingly, *P. alecto* tetherin isoform C was capable of  
21 restricting the release of Ebola VLPs to an extent similar to isoforms A and B, although it was marginally  
22 less restrictive of Marburg VLPs compared to isoforms A and B (Figure 13).

23 How isoform C could be capable of restricting the release of VLPs without a C-terminal GPI anchor is  
24 not presently known, although there are at least two possible explanations. The first is that the  
25 alternative C-terminal sequence of isoform C is involved in envelope or cellular membrane binding  
26 through an unknown mechanism. The second is that isoform C forms dimers in a manner distinct from  
27 that of isoforms A and B. One possibility is that it can form an antiparallel homodimer configuration  
28 in such a way that the N-terminus of one monomer aligns with the C-terminus of another monomer,  
29 forming a dimer with a transmembrane domain at each end of the protein. Another possibility is the  
30 formation of standard parallel dimers of tetherin followed by the formation of an antiparallel  
31 tetramer, similarly resulting in a quaternary structure possessing a transmembrane domain at either  
32 end. This possibility is supported by structural analyses demonstrating that human tetherin is capable  
33 of forming tetramers composed of antiparallel pairs of parallel dimers (57, 66).

## Discussion

### 1 Conclusions

2 Tetherin variants of the fruit bat *P. alecto* and the vesper bat *M. macropus* are functionally capable of  
3 restricting the release of VLPs in a mammalian cell culture system. These bats have evolved to express  
4 unique forms of tetherin that do not conform to the standard tetherin protein structure observed in  
5 tetherin proteins of other mammals. A structurally unique tetherin of *P. alecto*, isoform C, was not  
6 observed to restrict the release of HIVΔVpu VLPs but was capable of restricting filoviral VLPs. These  
7 findings raise questions regarding the possible antiviral range, mechanism of action, and *in vivo* function  
8 of structurally diverse forms of tetherin. Bat tetherin genes are under strong positive selection, indicating  
9 an ongoing process of evolution involving tetherin targets and viral antagonists. This evolutionary  
10 pressure has resulted in the expansion and diversification of tetherin genes in vesper bats of the genus  
11 *Myotis*, and the emergence of unique splice variants of tetherin in the fruit bat *P. alecto*, supporting the  
12 hypothesis of differential and unique antiviral gene evolution in bats.

### 13 Methods and Materials

#### 14 Sequence read archive (SRA) BLAST analysis

15 To predict the tetherin sequences of other bat species, the *P. alecto* tetherin isoform A coding domain  
16 nucleotide sequence (549 nt) was used as the search query for a separate BLASTn analysis of each of the  
17 publicly accessible sequence read archives (SRA) of bat transcriptomes (Table 1). This approach allowed  
18 the individual assembly of a tetherin homolog from each bat species for which a transcriptome sequence  
19 read archive was available. The BLASTn analyses were performed using the online SRA Nucleotide BLAST  
20 tool (<https://blast.ncbi.nlm.nih.gov/Blast.cgi>). The program selection was optimised for ‘somewhat  
21 similar sequences’ (BLASTn) and the selected algorithm parameters were as follows: Max target  
22 sequences = 1000; Expect threshold =  $1.0 \times 10^{-10}$ ; Word size = 7; Max matches in a query range = 21;  
23 Match/Mismatch scores = 2,-3; Gap costs of existence 5 and extension 2; and no filtering or masking was  
24 selected. Matching reads were downloaded and assembled using the Assemble Sequences tool in CLC  
25 Genomics Workbench 8.0 (CLC; Qiagen, Germany). The consensus sequence of the assembly was then  
26 used as the search query for a second SRA BLAST analysis with the same parameters as the first search  
27 with the following exceptions: Program selection was optimised for ‘highly similar sequences’  
28 (megablast); Expect threshold =  $1.0 \times 10^{-20}$ ; Word size = 28; Match/Mismatch scores = 1,-2; and linear gap  
29 costs of existence and extension. Matching reads were downloaded and assembled in the same manner,



## Methods and Materials

1 and the assembled consensus sequence was used in a third SRA BLAST using the same parameters as the  
2 second. This process was iteratively repeated for the assembled consensus sequence of each bat tetherin  
3 until it extended through the tetherin coding domain in both directions into the 5' and 3' untranslated  
4 regions, respectively demarcated by the locations of the start methionine and stop codon.

### 5 Evolutionary selection test

6 To determine if evolutionary selective pressures were being applied to bat tetherin, a selection test was  
7 performed. To detect the positively selected sites among bat tetherin sequences, a maximum likelihood  
8 (ML) phylogeny was generated with CODEML implemented in PAML4 software (67). The input tree was  
9 generated based on a pre-existing bat species tree (68) as well as cytb phylogeny derived from MEGA6  
10 (69) under the GTR+I+G nucleotide substitution model. The coding sequence alignments were fit to the  
11 NSsites models allowing (M8; positive selection model) or disallowing (M8a; null model) positive selection.  
12 Models were compared using a chi-squared test (degrees of freedom = 2) on twice the difference of  
13 likelihood values to derive P-values. The codon frequency model F3x4 was used. In cases where a  
14 significant difference ( $P < 0.01$ ) between M8a versus M8 was detected, the Bayes Empirical Bayes (BEB)  
15 analysis was used to identify codons with  $\omega$  (dN/dS)  $> 1$ , reporting values with posterior probability  $> 0.99$   
16 as high significance or 0.95 - 0.99 as moderate significance.

### 17 Identification of protein domains, structures, and motifs

18 To confirm the predicted tetherin nucleotide sequences and identify functional domains within bat  
19 tetherin protein sequences, translated coding domains were compared against known tetherin amino acid  
20 sequences including the human I-tetherin and the *P. alecto* tetherin isoform A (Figure 2). For all tetherin  
21 amino acid sequences, secondary structures were determined using the Predict Secondary Structure tool  
22 in CLC. The presence of cytoplasmic, transmembrane, and extracellular domains were determined using  
23 a hidden Markov model in TMHMM 2.0 (70). GPI signal sequences were determined using the online tool  
24 PredGPI (71) (<http://gpcr2.biocomp.unibo.it/gpipe/index.htm>). Pairwise comparisons between all  
25 tetherin sequences was conducted using the Create Pairwise Comparison tool in CLC. Multiple sequence  
26 alignments (MSA) of predicted and known tetherin amino acid and nucleotide sequences were performed  
27 using MUSCLE v3.8 (72) with the following parameters: Maximum iterations = 16, Find diagonals = No.

## Methods and Materials

### 1 Transcriptome and contig analysis

2 Approval for the use of bat tissue was granted by the Australian Centre for Disease Preparedness (ACDP)  
3 (formerly the Australian Animal Health Laboratory, AAHL) Animal Ethics committee (Protocol AEC1281).  
4 The *P. alecto* transcriptome is accessible through the NCBI Sequence Read Archive  
5 (<http://www.ncbi.nlm.nih.gov/Traces/sra/>) [SRA: SRP008674].  
6 To identify the homologs of tetherin in *P. alecto*, the human I-tetherin protein sequence [UniProt: Q10589-  
7 1] was used as a query in a tBLASTn analysis of the transcriptome of *P. alecto*. To identify assembled  
8 sequences (contigs) representing mRNA transcripts of interest, local tBLASTn analyses of the  
9 transcriptome of *P. alecto* were conducted with CLC using the following parameters: BLOSUM62 matrix,  
10 word size = 3, E-values <  $1 \times 10^{-12}$ , gap costs of existence 11, extension 1, with no filtering of regions of low  
11 complexity.

### 12 cDNA analysis

13 To amplify tetherin nucleotide sequences from bat cDNA, polymerase chain reaction (PCR) assays were  
14 performed using cDNA generated from *P. alecto* and *M. ricketti* spleen tissue, and *M. macropus* and *M.*  
15 *schreibersii* kidney cell lines, using various combinations of forward and reverse primers (Table 3A).  
16 Primers were designed using the tetherin predictions identified in the contig and SRA analyses. Primers  
17 were designed to bind to the 5' and 3' untranslated regions of bat cDNA such that the full CDS could be  
18 amplified. Bat capture, tissue collection and RNA extraction was conducted as previously reported (73)  
19 with the exception that RNAlater (Ambion, USA) preserved spleen tissue from four male adult bats was  
20 pooled before tissue homogenisation and followed with total RNA extraction with the Qiagen RNeasy Mini  
21 kit with on-column extraction of genomic DNA with DNase I. Total RNA was reverse transcribed into cDNA  
22 with the Qiagen Omniscript reverse transcriptase according to the manufacturer's protocol with the  
23 exception that the reaction contained 100 ng/ $\mu$ l total RNA, 1  $\mu$ M oligo-dT18 (Qiagen) and 10  $\mu$ M random  
24 hexamers (Promega).

25 All PCR amplification assays were performed using the Roche FastStart High Fidelity PCR system (Cat #  
26 04738292001) with an annealing temperature gradient of 54°C to 64°C in 2°C increments. Each reaction  
27 was made up to a total of 20  $\mu$ l, containing 1 unit of polymerase, 2 ng of total cDNA, and 8 pmol of each  
28 primer. All other parameters for PCR amplification were performed according to the manufacturer's  
29 protocol.

## Methods and Materials

1 Amplicons from PCR reactions were analysed by agarose gel electrophoresis (74). Individual DNA bands  
2 were physically excised from the gel. DNA was purified from the gel fragments using the Wizard SV Gel  
3 and PCR Clean Up kit (Promega, Fitchburg, USA) according to the manufacturer's protocol.

4 To further analyse the PCR amplified DNA, each DNA fragment was blunt-end ligated into the pCR2.1-  
5 TOPO-TA or pCR-Blunt-II-TOPO plasmid vector (Invitrogen, Waltham, USA). Ligation was performed using  
6 the TOPO TA or Zero Blunt TOPO PCR Cloning Kit (Invitrogen) according to the manufacturer's instructions  
7 and plasmids were transformed into Top10 *E. coli* using a standard heat-shock method (74). Plasmids were  
8 purified from these cultures using a Wizard Plus SV Miniprep DNA Purification kit (Promega). All inserted  
9 sequences were confirmed by Sanger sequencing using M13 forward and reverse primers (M13F and  
10 M13R; Table 3B).

## 11 Genome Mapping

12 To identify tetherin genes within the genomes of *P. alecto* and *M. macropus*, local BLASTn analyses were  
13 performed using CLC. For these analyses the *P. alecto* and *M. macropus* tetherin sequences were used as  
14 query sequences against the *P. alecto* genome [NCBI: PRJNA171993] and *M. lucifugus* genome [NCBI:  
15 GCF\_000147115]. BLASTn was performed using the following parameters: Word size = 11, E-values <  
16  $1 \times 10^{-3}$ , gap costs of existence 5, extension 2, with no filtering of regions of low complexity. Genes were  
17 delineated as beginning and ending at the first and last nucleotide of the contig query sequence. Exons  
18 were delineated as consisting of the nucleotide regions within the gene mapping to the tetherin cDNA  
19 sequences, bordered by the canonical 5'-AG and 3'-GT dinucleotide motifs (75). The 5' and 3' untranslated  
20 regions were defined as the regions upstream of the start methionine and downstream of the stop codon  
21 of the CDS, respectively. Contig sequences were mapped against gene scaffolds through a local BLASTn  
22 analysis using CLC Genomics Workbench with default settings. The nucleotide sequence preceding the  
23 first exon of each gene was assessed for the presence of promoter motifs.

24 Neighbouring genes were identified by BLAT (BLAST-like alignment tool) analysis (76) of the bordering  
25 nucleotide sequences upstream and downstream of tetherin genes using the Ensembl genome database  
26 BLAT tool  
27 (<http://asia.ensembl.org/Multi/Tools/Blast?db=core>).

## 28 Generation of tagged tetherin constructs for expression in mammalian cells

29 To enable detection of tetherin expression, the *P. alecto* tetherin isoforms A, B, and C, and *M. macropus*  
30 tetherin A and B were genetically modified with the insertion of nucleotide sequences encoding the

## Methods and Materials

1 haemagglutinin (HA) antibody-binding epitope. Tetherin sequences were modified through a 2-step PCR  
2 process. PCR reactions were performed using the Roche FastStart HighFidelity PCR kit according to the  
3 manufacturer's recommendations.

4 To express tetherin proteins in a mammalian cell culture system the tagged tetherin inserts were sub-  
5 cloned from the pCR2.1-TOPO (*P. alecto* tetherin isoforms A, B, and C) and pCR-Blunt-II-TOPO (*M.*  
6 *macropus* tetherin A and B) vectors into pcDNA3.1 mammalian expression vectors. The HA-tagged  
7 tetherin constructs contained terminal enzyme restriction sites. *P. alecto* tetherin constructs contained  
8 *XhoI* and *XbaI* sites at their 5' and 3' ends, respectively. *M. macropus* tetherin constructs contained an  
9 *EcoRI* site at each end. These sites, which are also present in the pcDNA3.1 vector, were used for digestion-  
10 ligation transfer of the HA-tagged tetherin sequences into pcDNA3.1. The ligation reaction products were  
11 transformed into Top10 *E. coli* and plasmid clones were purified from *E. coli* colonies using the method  
12 described under 'cDNA analysis'. All inserted sequences were verified by Sanger sequencing using the  
13 pcDNA3.1 vector sequencing primers, T7F forward and BGHR reverse (Table 3B).

### 14 [Expression, extraction, and detection of tetherin in a mammalian cell culture system](#)

15 To determine if the tetherin plasmids can express tetherin protein in a mammalian cell culture system,  
16 adherent human embryonic kidney HEK293T cells (kindly provided by Richard Axel, Columbia University)  
17 were transfected with each tetherin construct with protein expression determined by Western blot  
18 analysis.

19 HEK293T cells were maintained in Dulbecco's modified Eagle medium (DMEM-10, Thermo Fisher)  
20 enriched with heat-inactivated foetal calf serum (100ml/L; Invitrogen), glutamine (292 µg/ml; Invitrogen),  
21 and the antibiotics penicillin (100 units/ml; Invitrogen) and streptomycin (100 units/ml; Invitrogen)  
22 (DMEM-10). Cells were incubated at 37°C with 5% CO<sub>2</sub>.

23 The expression was performed in 6-well plates. Each well was seeded with 3.0x10<sup>5</sup> cells/well in 2 ml of  
24 DMEM-10. Cells were transfected when the monolayer had reached 50-60% confluency. The tetherin  
25 constructs analysed are listed in Table 4. Each plasmid construct was transfected into cells in duplicate  
26 wells at 2 µg/well using the transfection reagent Lipofectamine 2000 (Thermo Fisher) according to the  
27 manufacturer's protocol. Tetherin was extracted using a previously published GPI-anchored protein  
28 extraction protocol (48).

29 Protein samples were analysed by size-based separation through SDS-PAGE and visualisation using  
30 Western blot analysis (74). For the Western blot analysis, the primary antibody solution contained a

## Methods and Materials

1 1/1000 dilution of a monoclonal rabbit anti-HA antibody (C29F4, Cell Signaling Technology, Danvers, USA)  
2 in TBS containing 0.1% Tween-20, and the secondary antibody solution contained a 1/10,000 dilution of a  
3 polyclonal goat anti-rabbit IRD800 fluorophore-conjugate secondary antibody (Rockland, USA). The  
4 primary antibody solution was incubated overnight at 4°C, and the secondary antibody solution was  
5 incubated at room temperature for 1 h. To visualise fluorescent antibody-bound tetherin proteins,  
6 membranes were scanned using the Odyssey Imaging System (LI-COR Biosciences, Lincoln, USA) at  
7 wavelengths of 600 and 800 nm, using the default software settings.

## 8 Fluorescence microscopy

9 To visualise tetherin localisation within cells, 500 ng of plasmids encoding HA-tagged human I-tetherin  
10 and *P. alecto* tetherin isoforms A, B, and C were transfected into HEK293T cells seeded on glass coverslips  
11 as described above. At 48 h post transfection, cells were fixed with 4% paraformaldehyde (Sigma) in PBS  
12 for 10 min at room temperature, and then permeabilised in 0.2% Triton X-100 in PBS for 5 min at room  
13 temperature. Tetherin localisation in cells was detected by staining cells with anti-HA-tag rabbit  
14 monoclonal IgG (Thermo Fisher) diluted in 0.2% Triton X-100, 3% BSA in PBS for 1 h at room temperature.  
15 Cells were subsequently stained with anti-rabbit AlexaFluor 488 secondary IgG (Thermo Fisher) diluted in  
16 0.2% Triton X-100, 3% BSA in PBS for 20 min at room temperature. Nuclei are blue stained with Hoechst  
17 33342 (Thermo Fisher) according to the manufacturer's instructions. Coverslips were mounted onto glass  
18 slides with ProLong Gold Antifade Mountant (Thermo Fisher), then imaged on a Nikon AR1 confocal  
19 microscope and analysed with ImageJ (NIH) software.

## 20 qPCR analysis of tetherin expression across multiple bat tissues

21 To assess tetherin expression across various *P. alecto* tissues, tetherin mRNA levels were measured by  
22 qPCR analysis. The primers and probes were designed using the program Primer Express (Perkin–Elmer,  
23 Applied Biosystems, USA). The tetherin primers amplify all three known isoforms of *P. alecto* tetherin. *P.*  
24 *alecto* bats were trapped in Queensland, Australia, and transported alive by air to the ACDP in Victoria,  
25 where they were euthanised for dissection using methods approved by the ACDP animal ethics committee  
26 (AEC1389). Tissues were stored at –80 °C in RNeasy Lysis Buffer (Qiagen). Total RNA was extracted from frozen *P.*  
27 *alecto* tissues using a RNeasy 24 tissue homogeniser (Bertin Technologies, France) and an RNeasy mini  
28 kit (Qiagen) with on-column DNase-I treatment (Qiagen) to remove traces of genomic DNA.

29 Total RNA was subjected to real-time PCR using SuperScript III One-Step RT-PCR System (Invitrogen) with  
30 Platinum *Taq* DNA Polymerase. Reactions were performed on 100 ng of template RNA with 200 nM of

## Methods and Materials

1 each primer and 150 mM of the Taqman probe in an Applied Biosystems 7500 Fast Real-Time qPCR  
2 instrument. Cycling parameters consisted of 50°C, 5 min for the reverse transcription of RNA to cDNA  
3 followed by 95°C for 2 min. The cDNA was amplified by PCR for 40 cycles, each consisting of 95°C for 3 s  
4 and 60°C, 30 s.

5 Using the Livak/ $\Delta\Delta$  Ct method (77), tetherin Ct values were normalised against the expression/Ct values  
6 of the 18S rRNA housekeeping gene and reported as fold-difference, calibrated against the Ct values for  
7 wing tissue.

### 8 Transcriptome analysis of isoform expression under immune-stimulating treatments

9 To compare the expression of alternative isoforms of *P. alecto* tetherin and the impact of treatment with  
10 immune-stimulating compounds, bats were treated with PBS, LPS (Invivogen, #tlrl-pb5lps) or poly(I:C)  
11 (Invivogen, #vac-pic) as published previously (46). Briefly, 5 h post-intraperitoneal injection, bats were  
12 anaesthetised, culled and organs were processed for RNA, DNA, protein and cell suspensions as described  
13 previously (78). RNA libraries were prepared using RiboZero Plus rRNA-depletion kits (Illumina, USA) and  
14 cDNA was generated using a mix of oligo-dT/random hexamer primers, prior to sequencing in 2x150PE on  
15 the Illumina HiSeq platform.

16 Sequencing read libraries were quality controlled by analysis using FastQC (79). Illumina sequence  
17 adapters were removed and reads were trimmed or discarded on the basis of quality using the Trim  
18 Sequences tool in CLC. Overlapping paired reads were merged using the Merge Overlapping Pairs tool in  
19 CLC. Using the RNA-Seq Analysis tool in CLC, sequence reads were mapped against the *P. alecto* gene  
20 scaffold containing the tetherin gene (GenBank accession: KB030270.1), which was manually annotated  
21 with the tetherin gene and mRNA sequences for isoforms A, B, and C. The following parameters were used  
22 for the RNA-Seq analysis: mismatch = 3, insertion = 3, deletion = 3, length fraction = 0.6, similarity fraction  
23 = 0.95; default parameters were used otherwise. Isoform expression levels were normalised for post-  
24 trimming read library size and reported as counts-per-million reads (CPM). Non-parametric one-tailed  
25 Mann-Whitney tests were performed to calculate statistical significance between treatments. The *P.*  
26 *alecto* tetherin gene scaffold, annotation files, and read maps are provided in SI Data 2.

### 27 Functional validation of tetherin activity

28 To assess the effect of bat tetherin on the release of virus-like particles (VLPs), HEK293T cells were co-  
29 transfected with each tagged bat tetherin construct and either a HIV $\Delta$ Vpu plasmid construct, pCRV1-  
30 NLgagpol $\Delta$ Vpu, which expresses HIV NL4.3 Gag-pol $\Delta$ Vpu protein [NCBI: P12497.4]; an EBOV VP40

## Methods and Materials

1 plasmid, pGFPEVP40, expressing the Ebola Zaire virus VP40 Matrix protein [NCBI: NP\_066245]; or a MARV  
2 VP40 plasmid, pGFPEMVP40, expressing the Marburg virus VP40 Matrix protein [NCBI: YP\_001531155].  
3 EBOV and MARV VP40 proteins were encoded and expressed as VP40-eGFP fusion proteins. VLP plasmid  
4 constructs were kindly provided by Paul Bieniasz (Aaron Diamond AIDS Research Center, Rockefeller  
5 University) (80).

6 Transfections were performed as described above, with the following modifications: 12-well plates were  
7 seeded with  $1.5 \times 10^5$  cells/well in a total volume of 1 ml of DMEM-10, DNA-Lipofectamine mixtures for  
8 each well contained 1  $\mu$ l of Lipofectamine, and a total of 400 ng of DNA comprised of 200 ng of VLP plasmid  
9 DNA, and 0 – 200 ng of tetherin-encoding plasmid DNA, made up to a total mass of 200 ng with insert-  
10 free pcDNA3.1 plasmid DNA. Each sample was prepared in duplicate wells. Cells were incubated at 37°C  
11 with 5% CO<sub>2</sub> for a total of 48 h. After 24 h, 1 ml of DMEM-10 was added to each well. Following incubation  
12 cell lysates and supernatants were collected for further analysis.

13 Cell culture supernatants were collected and clarified. Clarified supernatants were layered over 2 ml of a  
14 25% (w/v) sucrose solution in 13.2 ml Thinwall Polypropylene SW41 Ti ultracentrifuge tubes (Beckman-  
15 Coulter, Brea, USA) and made up to a total volume of 10 ml with PBS without calcium chloride or  
16 magnesium chloride (PBS[-]). Samples were then centrifuged at 130,000 x *g* for 2 h using an Optima L-100  
17 XP ultracentrifuge (Beckmann-Coulter). VLP pellets were lysed in 60  $\mu$ l of NP-40 lysis buffer (Sigma-  
18 Aldrich), supplemented with 10  $\mu$ g/ml of aprotinin, leupeptin, and pepstatin A protease inhibitors (Sigma-  
19 Aldrich).

20 The cells from each well were resuspended in 500  $\mu$ l of PBS[-] and transferred to 1.5 ml tubes and  
21 centrifuged at 200 x *g* for 5 min. Cell pellets were lysed in 100  $\mu$ l of NP-40 lysis buffer. Following lysis  
22 samples were centrifuged at 20,000 x *g* for 5 min, supernatants were transferred to a new 1.5 ml tubes.

23 Cell and viral lysates were analysed by SDS-PAGE and Western blot analysis as described above, with the  
24 following exceptions. For HIV VLPs, the primary antibody binding was directed against the Gag protein  
25 using a solution containing a 1/4000 dilution of a mouse anti-p24 antibody (NIH AIDS Reagent Repository,  
26 Germantown, USA), 0.1% Tween-20, in PBS[-]. For Ebola and Marburg VLPs, the primary antibody binding  
27 was directed against eGFP using a solution containing a 1/4000 dilution of a mouse anti-GFP 4B10  
28 antibody (Cell Signaling Technology, USA). For all VLPs, the secondary antibody was a 1/10,000 diluted  
29 polyclonal goat anti-mouse Alexa-Fluor 680 fluorophore-conjugate fluorescent secondary antibody  
30 (Thermo Fisher).

## Methods and Materials

1 VLPs released into the supernatant for each sample were quantified using a densitometric analysis of  
2 the signal strength of the fluorescent antibodies bound to VLP proteins. Densitometry was performed  
3 using the Image Studio Lite v5.2 software suite (LI-COR). Variation in viral lysate signal strength across  
4 samples was normalised using the signal strength of the cell lysates. The non-parametric Wilcoxon Rank  
5 Sum test was performed to calculate the statistical significance of the restriction of Ebola and Marburg  
6 VLPs in the 200 ng tetherin isoform C treatment groups.

## 7 Data availability

8 The data underlying this article are available in this article and its online supplementary material. Novel  
9 tetherin sequences have been deposited in GenBank, at <https://www.ncbi.nlm.nih.gov/genbank/> with  
10 accession numbers listed in supplementary table 1.

## 11 Acknowledgments

12 We thank Paul Bieniasz for providing the pCRV1-NLgagpol $\Delta$ Vpu plasmid construct. We thank Richard Axel  
13 for providing HEK293T cells. This work was supported by the National Health and Medical Research  
14 Council (NHMRC), grant number GNT1121077, awarded to G.T., M.L.B., and G.A.M., and NHMRC Senior  
15 Research Fellowship GNT1117748 to G.T. J.A.H. was funded by NHMRC GNT1121077 and a Monash  
16 University Vice Chancellor's Honours-PhD scholarship. L-F.W. is funded by the Singapore National  
17 Research Foundation grants NRF2012NRF-CRP001-056 and NRF2016NRF-NSFC002-013. The authors  
18 gratefully acknowledge the contribution to this work of the Victorian Operational Infrastructure Support  
19 Program received by the Burnet Institute.

## 20 Author's Contributions

21 J.A.H., M.T., L-F.W., and G.T. designed the study; J.A.H., J.C., A.T.I, A.N., I.S., T.B.G. and A.J., performed  
22 research and analysed data; J.A.H., M.T., A.J., A.N., V.B., G.A.M., M.L.B., L-F.W., and G.T. discussed and  
23 interpreted the results; J.A.H. wrote the first draft of the paper; J.A.H., and G.T. critically edited the  
24 manuscript.

## References

1. C. H. Calisher, J. E. Childs, H. E. Field, K. V. Holmes, T. Schountz, Bats: Important reservoir hosts of emerging viruses. *Clin. Microbiol. Rev.* **19**, 531-545 (2006).



## References

2. I. Smith, L.-F. Wang, Bats and their virome: an important source of emerging viruses capable of infecting humans. *Curr. Opin. Virol.* **3**, 84-91 (2013).
3. B. R. Amman *et al.*, A recently discovered pathogenic paramyxovirus, Sosuga virus, is present in *Rousettus aegyptiacus* fruit bats at multiple locations in Uganda. *J. Wildl. Dis.* **51**, 774-779 (2015).
4. P. Zhou *et al.*, A pneumonia outbreak associated with a new coronavirus of probable bat origin. *Nature*, 1-4 (2020).
5. M. Letko, S. N. Seifert, K. J. Olival, R. K. Plowright, V. J. Munster, Bat-borne virus diversity, spillover and emergence. *Nat. Rev. Microbiol.*, 1-11 (2020).
6. R. Swanepoel, Experimental inoculation of plants and animals with Ebola virus. *Emerging Infect. Dis.* **2**, 321 (1996).
7. M. M. Williamson *et al.*, Transmission studies of Hendra virus (equine morbilli-virus) in fruit bats, horses and cats. *Aust. Vet. J.* **76**, 813-818 (1998).
8. D. J. Middleton *et al.*, Experimental Nipah virus infection in pteropid bats (*Pteropus poliocephalus*). *J. Comp. Pathol.* **136**, 266-272 (2007).
9. S. Watanabe *et al.*, Bat coronaviruses and experimental infection of bats, the Philippines. *Emerging Infect. Dis.* **16**, 1217-1223 (2010).
10. M. E. Jones *et al.*, Experimental inoculation of Egyptian rousette bats (*Rousettus aegyptiacus*) with viruses of the Ebolavirus and Marburgvirus genera. *Viruses* **7**, 3420-3442 (2015).
11. M. L. Baker, T. Schountz, L. F. Wang, Antiviral immune responses of bats: A review. *Zoonoses Public Hlth.* 10.1111/j.1863-2378.2012.01528.x, 1-13 (2013).
12. G. Zhang *et al.*, Comparative analysis of bat genomes provides insight into the evolution of flight and immunity. *Science* **339**, 456-460 (2013).
13. P. Zhou *et al.*, Contraction of the type I IFN locus and unusual constitutive expression of IFN- $\alpha$  in bats. *Proc. Natl. Acad. Sci. USA*, 201518240 (2016).
14. J. A. Hayward *et al.*, Differential evolution of antiretroviral restriction factors in pteropid bats as revealed by *APOBEC3* gene complexity. *Mol. Biol. Evol.* **35**, 1626-1637 (2018).
15. S. S. Pavlovich *et al.*, The Egyptian rousette genome reveals unexpected features of bat antiviral immunity. *Cell* **173**, 1098-1110. e1018 (2018).
16. J. N. Mandl, C. Schneider, D. S. Schneider, M. L. Baker, Going to bat(s) for studies of disease tolerance. *Front. Immunol.* **9**, 2112 (2018).
17. J. A. Hawkins *et al.*, A metaanalysis of bat phylogenetics and positive selection based on genomes and transcriptomes from 18 species. *Proc. Natl. Acad. Sci. U. S. A.* **116**, 11351-11360 (2019).
18. M. Hölzer *et al.*, Virus-and interferon alpha-induced transcriptomes of cells from the microbat *Myotis daubentonii*. *iScience* **19**, 647-661 (2019).

## References

19. J. H. Morrison *et al.*, A potent postentry restriction to primate lentiviruses in a yinpterochiropteran bat. *Mbio* **11** (2020).
20. D. Jebb *et al.*, Six reference-quality genomes reveal evolution of bat adaptations. *Nature* **583**, 578-584 (2020).
21. S. J. D. Neil, T. Zang, P. D. Bieniasz, Tetherin inhibits retrovirus release and is antagonized by HIV-1 Vpu. *Nature* **451**, 425-430 (2008).
22. T. Sakuma, T. Noda, S. Urata, Y. Kawaoka, J. Yasuda, Inhibition of Lassa and Marburg virus production by tetherin. *J. Virol.* **83**, 2382-2385 (2009).
23. M. Hoffmann *et al.*, Tetherin inhibits Nipah virus but not Ebola virus replication in fruit bat cells. *J. Virol.* **93** (2019).
24. J. W. Wynne, L.-F. Wang, Bats and viruses: Friend or foe? *PLoS Pathog.* **9**, e1003651 (2013).
25. S. M. Wang, K. J. Huang, C. T. Wang, Severe acute respiratory syndrome coronavirus spike protein counteracts BST2-mediated restriction of virus-like particle release. *J. Med. Virol.* **91**, 1743-1750 (2019).
26. L.-F. Wang, D. E. Anderson, Viruses in bats and potential spillover to animals and humans. *Curr. Opin. Virol.* **34**, 79-89 (2019).
27. J. A. Hayward *et al.*, Infectious KoRV-related retroviruses circulating in Australian bats. *Proc. Natl. Acad. Sci. U. S. A.* **117**, 9529-9536 (2020).
28. D. Perez-Caballero *et al.*, Tetherin inhibits HIV-1 release by directly tethering virions to cells. *Cell* **139**, 499-511 (2009).
29. D. Blanco-Melo, S. Venkatesh, P. D. Bieniasz, Origins and evolution of tetherin, an orphan antiviral gene. *Cell Host Microbe* **20**, 189-201 (2016).
30. L. J. Cocka, P. Bates, Identification of alternatively translated tetherin isoforms with differing antiviral and signaling activities. *PLoS Pathog.* **8**, e1002931 (2012).
31. Rui P. Galão, A. Le Tortorec, S. Pickering, T. Kueck, Stuart J. D. Neil, Innate sensing of HIV-1 assembly by Tetherin induces NF- $\kappa$ B-dependent proinflammatory responses. *Cell Host Microbe* **12**, 633-644 (2012).
32. A. Tokarev *et al.*, Stimulation of NF- $\kappa$ B activity by the HIV restriction factor BST2. *J. Virol.* **87**, 2046-2057 (2013).
33. A. Matsuda *et al.*, Large-scale identification and characterization of human genes that activate NF- $\kappa$ B and MAPK signaling pathways. *Oncogene* **22**, 3307-3318 (2003).
34. J. Ishikawa *et al.*, Molecular cloning and chromosomal mapping of a bone marrow stromal cell surface gene, BST2, that may be involved in pre-B-cell growth. *Genomics* **26**, 527-534 (1995).
35. R. A. Liberatore, P. D. Bieniasz, Tetherin is a key effector of the antiretroviral activity of type I interferon in vitro and in vivo. *Proc. Natl. Acad. Sci. U. S. A.* **108**, 18097-18101 (2011).
36. E. Erikson *et al.*, In vivo expression profile of the antiviral restriction factor and tumor-targeting antigen CD317/BST-2/HM1. 24/tetherin in humans. *Proc. Natl. Acad. Sci. U. S. A.* **108**, 13688-13693 (2011).

## References

37. H. Yang *et al.*, Structural insight into the mechanisms of enveloped virus tethering by tetherin. *Proc. Natl. Acad. Sci. U. S. A.* **107**, 18428-18432 (2010).
38. A. Hinz *et al.*, Structural basis of HIV-1 tethering to membranes by the BST-2/tetherin ectodomain. *Cell Host Microbe* **7**, 314-323 (2010).
39. S. Kupzig *et al.*, Bst-2/HM1. 24 is a raft-associated apical membrane protein with an unusual topology. *Traffic* **4**, 694-709 (2003).
40. R. Rollason, V. Korolchuk, C. Hamilton, P. Schu, G. Banting, Clathrin-mediated endocytosis of a lipid-raft-associated protein is mediated through a dual tyrosine motif. *J. Cell Sci.* **120**, 3850-3858 (2007).
41. E. Takeda *et al.*, Identification and functional analysis of three isoforms of bovine BST-2. *PLoS One* **7**, e41483 (2012).
42. Y. Iwabu *et al.*, HIV-1 accessory protein Vpu internalizes cell-surface BST-2/tetherin through transmembrane interactions leading to lysosomes. *J. Biol. Chem.* **284**, 35060-35072 (2009).
43. A. Fukuma, M. Abe, Y. Morikawa, T. Miyazawa, J. Yasuda, Cloning and characterization of the antiviral activity of feline Tetherin/BST-2. *PLoS one* **6** (2011).
44. M. Ruedi *et al.*, Molecular phylogenetic reconstructions identify East Asia as the cradle for the evolution of the cosmopolitan genus *Myotis* (Mammalia, Chiroptera). *Mol. Phylog. Evol.* **69**, 437-449 (2013).
45. M. J. Benton, P. C. J. Donoghue, Paleontological evidence to date the tree of life. *Mol. Biol. Evol.* **24**, 26-53 (2007).
46. P. Periasamy *et al.*, Studies on B cells in the fruit-eating black flying fox (*Pteropus alecto*). *Front. Immunol.* **10** (2019).
47. L. Mok *et al.*, Proteomic analysis of *Pteropus alecto* kidney cells in response to the viral mimic, Poly I:C. *Proteome Sci.* **13**, 1-11 (2015).
48. T. L. Doering, P. T. Englund, G. W. Hart, Detection of glycosphospholipid anchors on proteins. *Curr. Protoc. Protein. Sci.*, 12.15. 11-12.15. 14 (2001).
49. M. Dubé *et al.*, Suppression of Tetherin-restricting activity upon human immunodeficiency virus type 1 particle release correlates with localization of Vpu in the trans-Golgi network. *J. Virol.* **83**, 4574-4590 (2009).
50. I. Dietrich *et al.*, Feline tetherin efficiently restricts release of feline immunodeficiency virus but not spreading of infection. *J. Virol.* **85**, 5840-5852 (2011).
51. F. Arnaud *et al.*, Interplay between ovine bone marrow stromal cell antigen 2/tetherin and endogenous retroviruses. *J. Virol.* **84**, 4415-4425 (2010).
52. L. F. Wang, D. E. Anderson, Viruses in bats and potential spillover to animals and humans. *Curr. Opin. Virol.* **34**, 79-89 (2019).
53. E. C. Teeling *et al.*, Bat biology, genomes, and the Bat1K project: to generate chromosome-level genomes for all living bat species. *Annu. Rev. Anim. Biosci.* **6**, 23-46 (2018).
54. T. J. O'Shea *et al.*, Bat flight and zoonotic viruses. *Emerging Infect. Dis.* **20**, 741-745 (2014).

## References

55. J. Kacprzyk *et al.*, A potent anti-inflammatory response in bat macrophages may be linked to extended longevity and viral tolerance. *Acta Chiropt.* **19**, 219-228 (2017).
56. M. Celestino *et al.*, Feline tetherin is characterized by a short N-terminal region and is counteracted by the feline immunodeficiency virus envelope glycoprotein. *J. Virol.* **86**, 6688-6700 (2012).
57. H. L. Schubert *et al.*, Structural and functional studies on the extracellular domain of BST2/tetherin in reduced and oxidized conformations. *Proc. Natl. Acad. Sci. U. S. A.* **107**, 17951-17956 (2010).
58. A. J. Andrew, E. Miyagi, S. Kao, K. Strebel, The formation of cysteine-linked dimers of BST-2/tetherin is important for inhibition of HIV-1 virus release but not for sensitivity to Vpu. *Retrovirology* **6**, 80 (2009).
59. M. W. McNatt *et al.*, Species-specific activity of HIV-1 Vpu and positive selection of tetherin transmembrane domain variants. *PLoS Pathog* **5**, e1000300 (2009).
60. S. Venkatesh, P. D. Bieniasz, Mechanism of HIV-1 virion entrapment by tetherin. *PLoS Pathog.* **9**, e1003483 (2013).
61. T. Sakuma, A. Sakurai, J. Yasuda, Dimerization of tetherin is not essential for its antiviral activity against Lassa and Marburg viruses. *PLoS One* **4**, e6934 (2009).
62. J. A. Hayward *et al.*, Identification of diverse full-length endogenous betaretroviruses in megabats and microbats. *Retrovirology* **10**, 35 (2013).
63. E. C. Skirmuntt, M. Escalera-Zamudio, E. C. Teeling, A. Smith, A. Katzourakis, The potential role of endogenous viral elements in the evolution of bats as reservoirs for zoonotic viruses. *Annu. Rev. Virol.* **7**, 103-119 (2020).
64. J. Cui *et al.*, Identification of diverse groups of endogenous gammaretroviruses in mega and microbats. *J. Gen. Virol.* **93**, 2037-2045 (2012).
65. B. M. Hause, E. A. Nelson, J. Christopher-Hennings, North American big brown bats (*Eptesicus fuscus*) harbor an exogenous deltaretrovirus. *mSphere* **5** (2020).
66. M. Swiecki *et al.*, Structural and biophysical analysis of BST-2/tetherin ectodomains reveals an evolutionary conserved design to inhibit virus release. *J. Biol. Chem.* **286**, 2987-2997 (2011).
67. Z. Yang, PAML 4: phylogenetic analysis by maximum likelihood. *Mol. Biol. Evol.* **24**, 1586-1591 (2007).
68. E. C. Teeling *et al.*, A molecular phylogeny for bats illuminates biogeography and the fossil record. *Science* **307**, 580-584 (2005).
69. K. Tamura, G. Stecher, D. Peterson, A. Filipski, S. Kumar, MEGA6: molecular evolutionary genetics analysis version 6.0. *Mol. Biol. Evol.* **30**, 2725-2729 (2013).
70. A. Krogh, B. Larsson, G. Von Heijne, E. L. Sonnhammer, Predicting transmembrane protein topology with a hidden Markov model: application to complete genomes. *J. Mol. Biol.* **305**, 567-580 (2001).
71. A. Pierleoni, P. Martelli, R. Casadio, PredGPI: a GPI-anchor predictor. *BMC Bioinformatics* **9**, 1 (2008).
72. R. C. Edgar, MUSCLE: multiple sequence alignment with high accuracy and high throughput. *Nuc Acid Res* **32**, 1792-1797 (2004).

## References

73. C. Cowled *et al.*, Molecular characterisation of Toll-like receptors in the black flying fox *Pteropus alecto*. *Dev. Comp. Immunol.* **35**, 7-18 (2011).
74. J. Sambrook, E. F. Fritsch, T. Maniatis, *Molecular cloning* (Cold spring harbor laboratory press New York, 1989), vol. 2.
75. T. A. Brown, "Synthesis and processing of RNA" in *Genomes*. (Oxford: Wiley-Liss, 2002).
76. W. J. Kent, BLAT—the BLAST-like alignment tool. *Genome Res.* **12**, 656-664 (2002).
77. K. J. Livak, T. D. Schmittgen, Analysis of relative gene expression data using real-time quantitative PCR and the 2- $\Delta\Delta$ CT method. *Methods* **25**, 402-408 (2001).
78. A. T. Irving *et al.*, Optimizing dissection, sample collection and cell isolation protocols for frugivorous bats. *Methods Ecol. Evol.* **11**, 150-158 (2020).
79. S. Andrews (2010) FastQC: a quality control tool for high throughput sequence data. <http://www.bioinformatics.babraham.ac.uk/projects/fastqc/>.
80. N. Jouvenet *et al.*, Broad-spectrum inhibition of retroviral and filoviral particle release by tetherin. *J. Virol.* **83**, 1837-1844 (2009).

## Figures and Legends

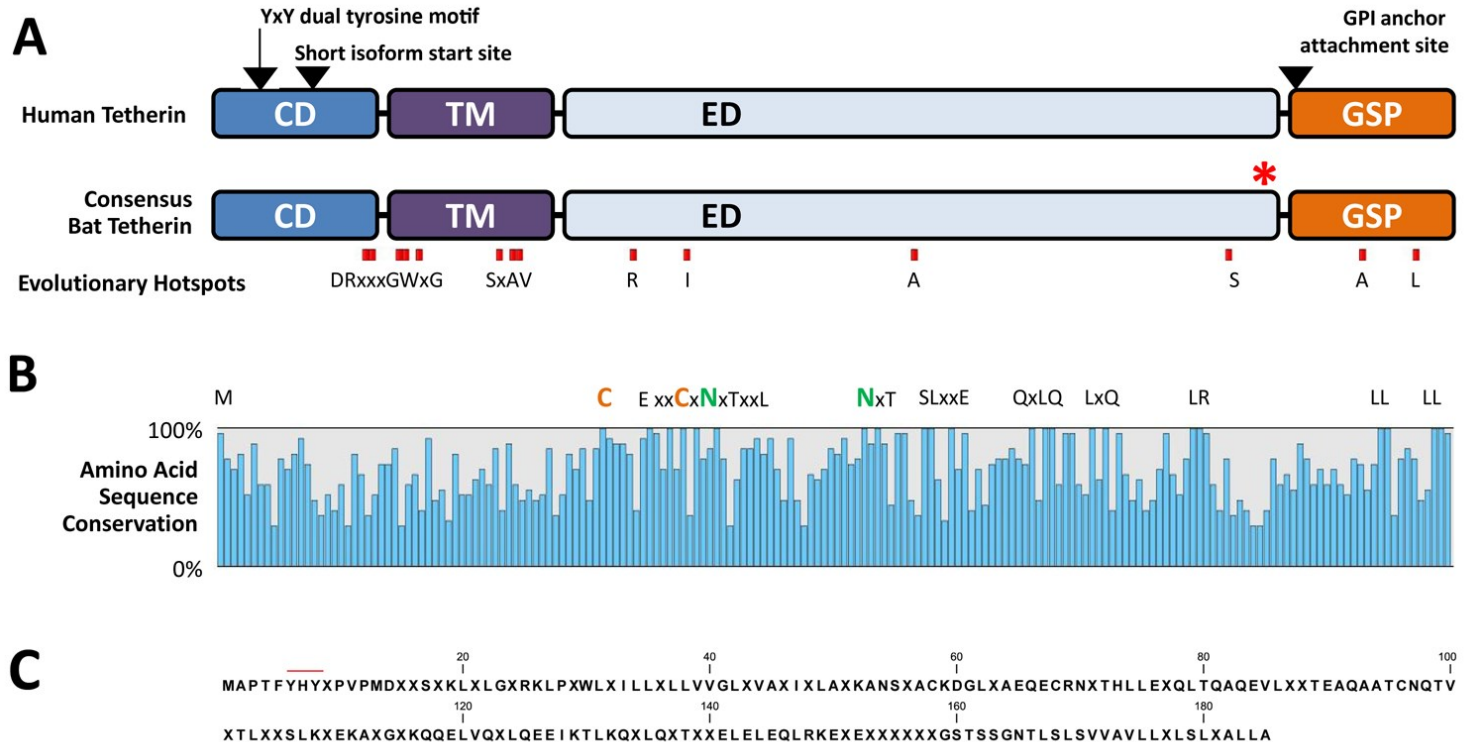

**Figure 1. Bat Tetherin structure and sequence diversity.** **A.** The consensus bat tetherin amino acid sequence structures and motifs generated through the multiple sequence alignment of tetherin from 27 bat species (SI Data 1) and compared against human tetherin. Strong positive selection of bat tetherin is revealed by the ratio of non-synonymous to synonymous mutations (Table 2), and is represented as evolutionary hotspots. The YxY dual tyrosine motif, the alternative start site for the short isoform of tetherin, and the GPI anchor attachment site positions are indicated by arrows. The red asterisk (\*) indicates the location of the inserted molecular tags in the *P. alecto* and *M. macropus* tetherin expression constructs. CD, cytoplasmic domain; TM, transmembrane domain; ED, extracellular domain; GPI, glycosylphosphatidylinositol; GSP, GPI signal peptide. **B.** Significant sequence diversity exists among bat tetherin proteins, indicated by the percentage of amino acid sequence conservation at each site of the consensus bat tetherin. Amino acids conserved in all 27 sequences are represented by their letters. Amino acids represented by X are variable and are included to indicate the sequence distance between closely positioned conserved residues. **C.** The consensus bat tetherin sequence. Amino acid residues represented in > 50% of bat tetherin sequences are indicated with their letter. Positions at which no amino acid residue is represented in > 50% of bat tetherin sequences are indicated with 'X'. The red line indicates the position of the dual tyrosine motif.

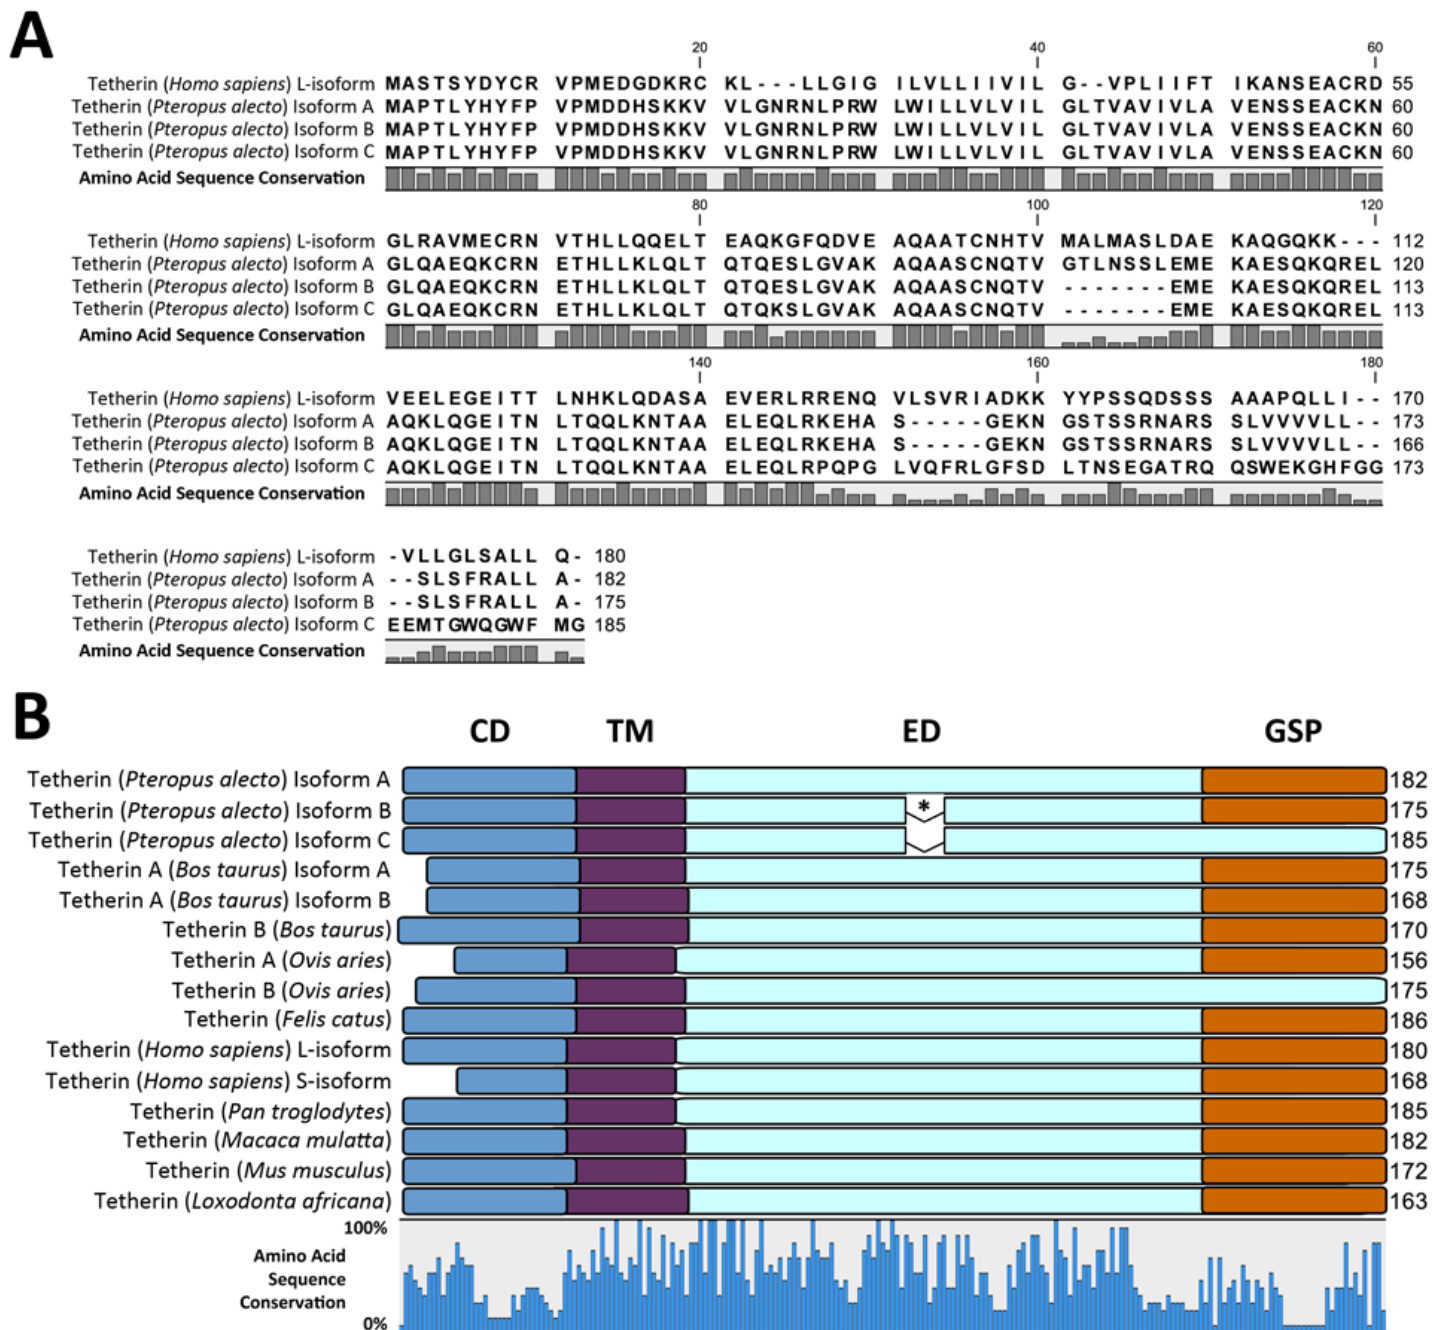

**Figure 2. Multiple sequence alignment (MSA) and protein domains of mammalian tetherin amino acid sequences. A.** MSA reveals amino acid residues differing between human and *P. alecto* sequences which are indicated by the amino acid sequence conservation bar graph below the sequences. **B.** The protein domains of mammalian tetherin proteins are depicted as overlays of an MSA. Sequence conservation is indicated by the bar graph below the alignment. Protein domains are colour coded: CD (blue), cytoplasmic domain; TM (purple), transmembrane domain; ED (light blue), extracellular domain; GSP (orange), glycoposphatidylinositol signal peptide; \* a 7 AA exclusion in *P. alecto* tetherin isoforms B and C relative to isoform A is indicated.

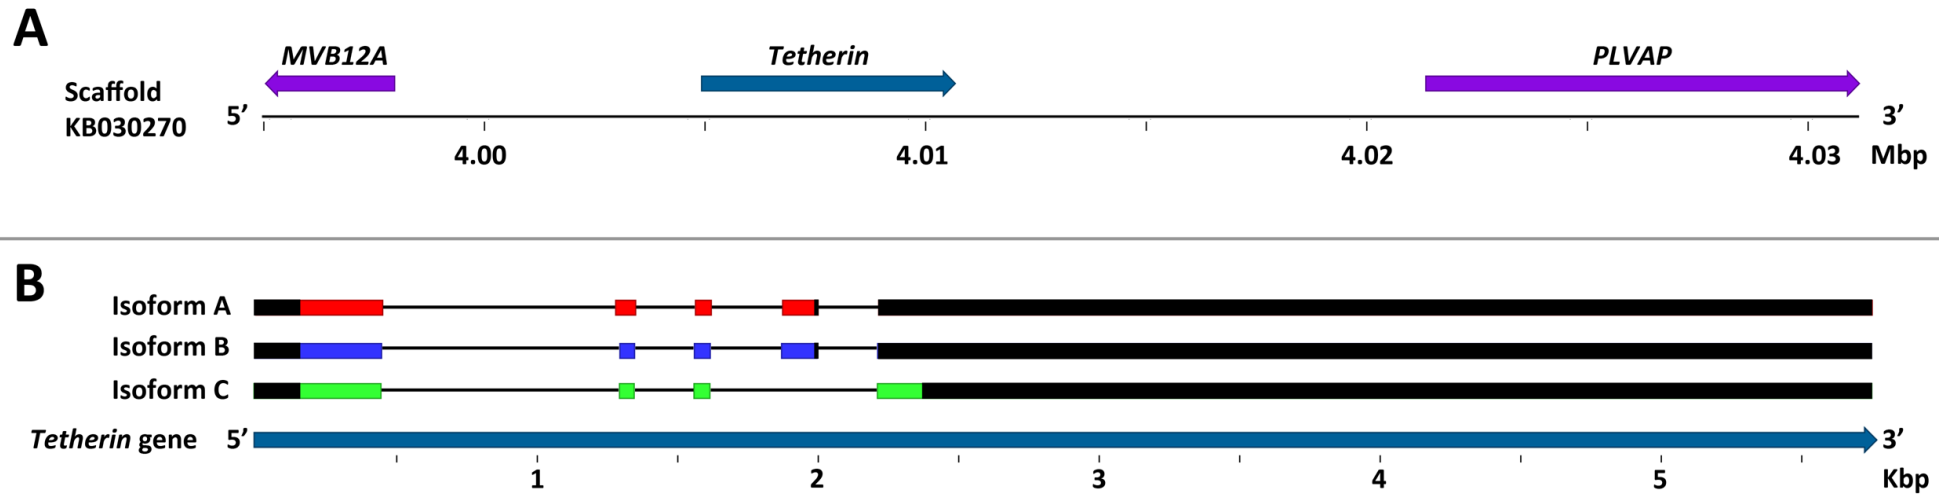

**Figure 3. Mapping the tetherin gene to the *P. alecto* genome.** **A.** The tetherin gene location and neighbouring genes, coloured purple, are depicted. Arrows indicate the orientation of each gene's protein coding domain sequence. Sequence numbers and gene orientations are relative to the beginning of the gene scaffold in the 5' to 3' direction. **B.** The tetherin mRNA exons are depicted and colour coded: Isoform A, red; Isoform B, blue; Isoform C, green. Exons are mapped to scale against the tetherin gene. Sequence numbers are relative to the beginning of the gene. The 5' and 3' untranslated regions of the mRNA are coloured black.



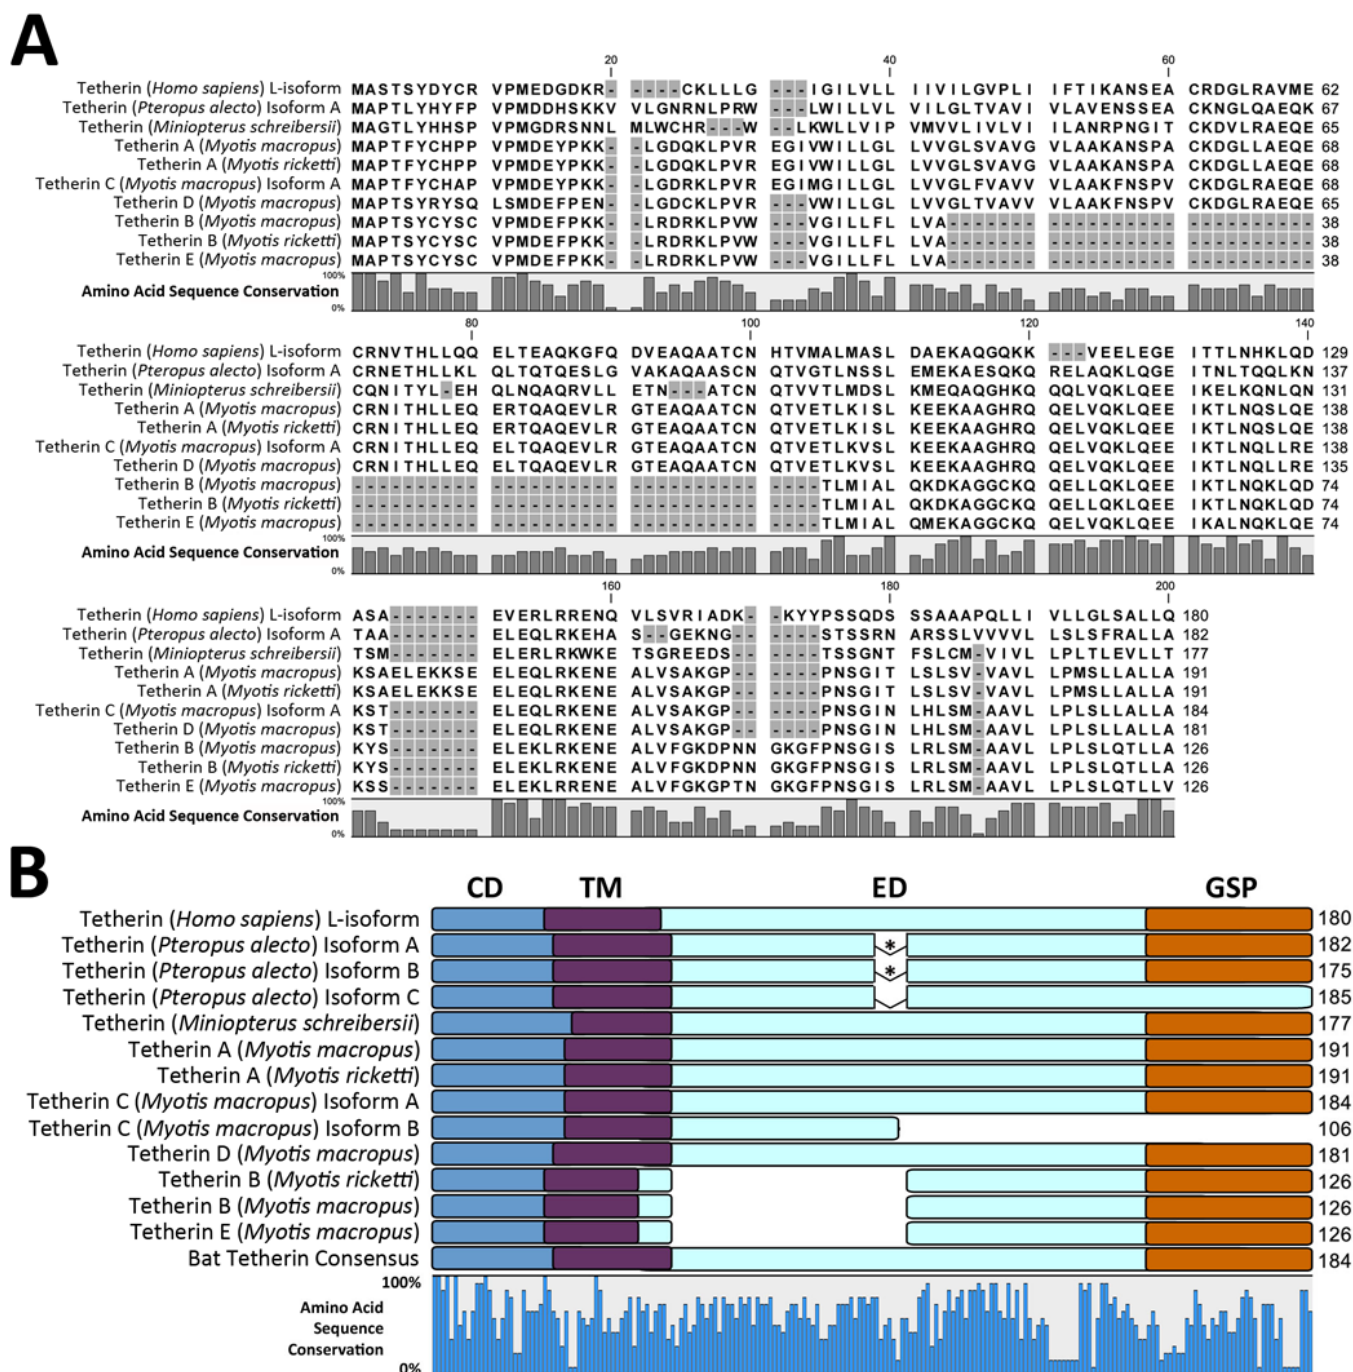

**Figure 4. Multiple sequence alignment (MSA) and protein domains of fruit bat and vesper bat tetherin amino acid sequences. A.** The percentage of sequence conservation is indicated by a bar plot below the MSA. Gap positions are shaded in grey. **B.** The protein domains of bat tetherin proteins are depicted as overlays of an MSA. Amino acid sequence conservation is indicated by the bar graph below the alignment. Protein domains are indicated and colour coded as follows: CD (blue), cytoplasmic domain; TM (purple), transmembrane domain; ED, (light blue) extracellular domain; GSP (orange), glycoposphatidylinositol signal peptide. \* The 7 AA exclusion in *P. alecto* tetherin isoform B and C relative to isoform A is indicated.

**A**

|                                                 | 1 | 2   | 3     | 4     | 5     | 6      | 7     |       |
|-------------------------------------------------|---|-----|-------|-------|-------|--------|-------|-------|
| Tetherin ( <i>Homo sapiens</i> ) L-isoform      | 1 |     | 37.50 | 34.59 | 43.55 | 43.55  | 43.24 | 43.17 |
| Tetherin ( <i>Pteropus alecto</i> ) Isoform A   | 2 | 115 |       | 43.48 | 53.23 | 53.23  | 53.51 | 52.46 |
| Tetherin ( <i>Miniopterus schreibersii</i> )    | 3 | 121 | 104   |       | 49.73 | 49.73  | 49.46 | 49.18 |
| Tetherin A ( <i>Myotis macropus</i> )           | 4 | 105 | 87    | 93    |       | 100.00 | 89.13 | 84.24 |
| Tetherin A ( <i>Myotis ricketti</i> )           | 5 | 105 | 87    | 93    | 0     |        | 89.13 | 84.24 |
| Tetherin C ( <i>Myotis macropus</i> ) Isoform A | 6 | 105 | 86    | 93    | 20    | 20     |       | 91.26 |
| Tetherin D ( <i>Myotis macropus</i> )           | 7 | 104 | 87    | 93    | 29    | 29     | 16    |       |

**B**

|                                               | 1 | 2  | 3     | 4     | 5     | 6      |       |
|-----------------------------------------------|---|----|-------|-------|-------|--------|-------|
| Tetherin ( <i>Homo sapiens</i> ) L-isoform    | 1 |    | 32.03 | 31.01 | 37.50 | 37.50  | 39.06 |
| Tetherin ( <i>Pteropus alecto</i> ) Isoform A | 2 | 87 |       | 42.40 | 44.62 | 44.62  | 44.62 |
| Tetherin ( <i>Miniopterus schreibersii</i> )  | 3 | 89 | 72    |       | 40.77 | 40.77  | 42.31 |
| Tetherin B ( <i>Myotis macropus</i> )         | 4 | 80 | 72    | 77    |       | 100.00 | 92.06 |
| Tetherin B ( <i>Myotis ricketti</i> )         | 5 | 80 | 72    | 77    | 0     |        | 92.06 |
| Tetherin E ( <i>Myotis macropus</i> )         | 6 | 78 | 72    | 75    | 10    | 10     |       |

**Figure 5. Pairwise comparisons between human and bat tetherin variants.**

**A.** *M. macropus* tetherin A, C, and D. **B.** *M. macropus* tetherin B and E analysed separately to A, C and D to account for the inclusion of 60 AA in *M. macropus* tetherin A, C, and D that is otherwise removed following gap treatment of the alignment of *M. macropus* B and E. Protein sequences of human and bat tetherins were aligned and gaps were removed. The horizontal axis represents percentage identity between pairs of amino acid sequences, coloured with a white to red gradient indicating increasing similarity as red intensity increases. The vertical axis represents the number of amino acid residue identity differences between sequence pairs, coloured with a white to blue gradient indicating increasing difference as blue intensity increases.

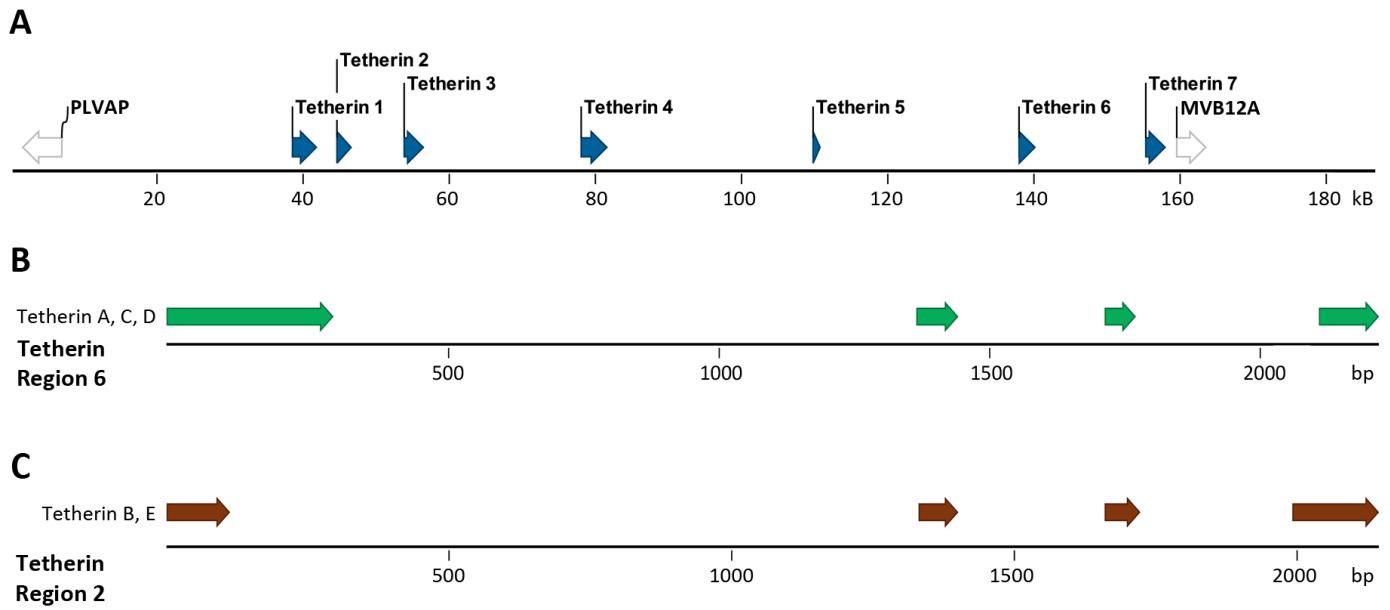

**Figure 6. Mapping the tetherin genes of *M. macropus* to the *M. lucifugus* genome.** Tetherin sequences derived from *M. macropus* cDNA were mapped against the publicly available genome of *M. lucifugus* (Myoluc2.0 genome assembly). **A.** The tetherin gene locus of *M. lucifugus* is contained within scaffold GL430608 between the PLVAP and MVB12A genes. **B.** *M. macropus* tetherin A, C, and D mapped against *M. lucifugus* tetherin region 6. **C.** *M. macropus* tetherin B and E mapped against *M. lucifugus* tetherin region 2.

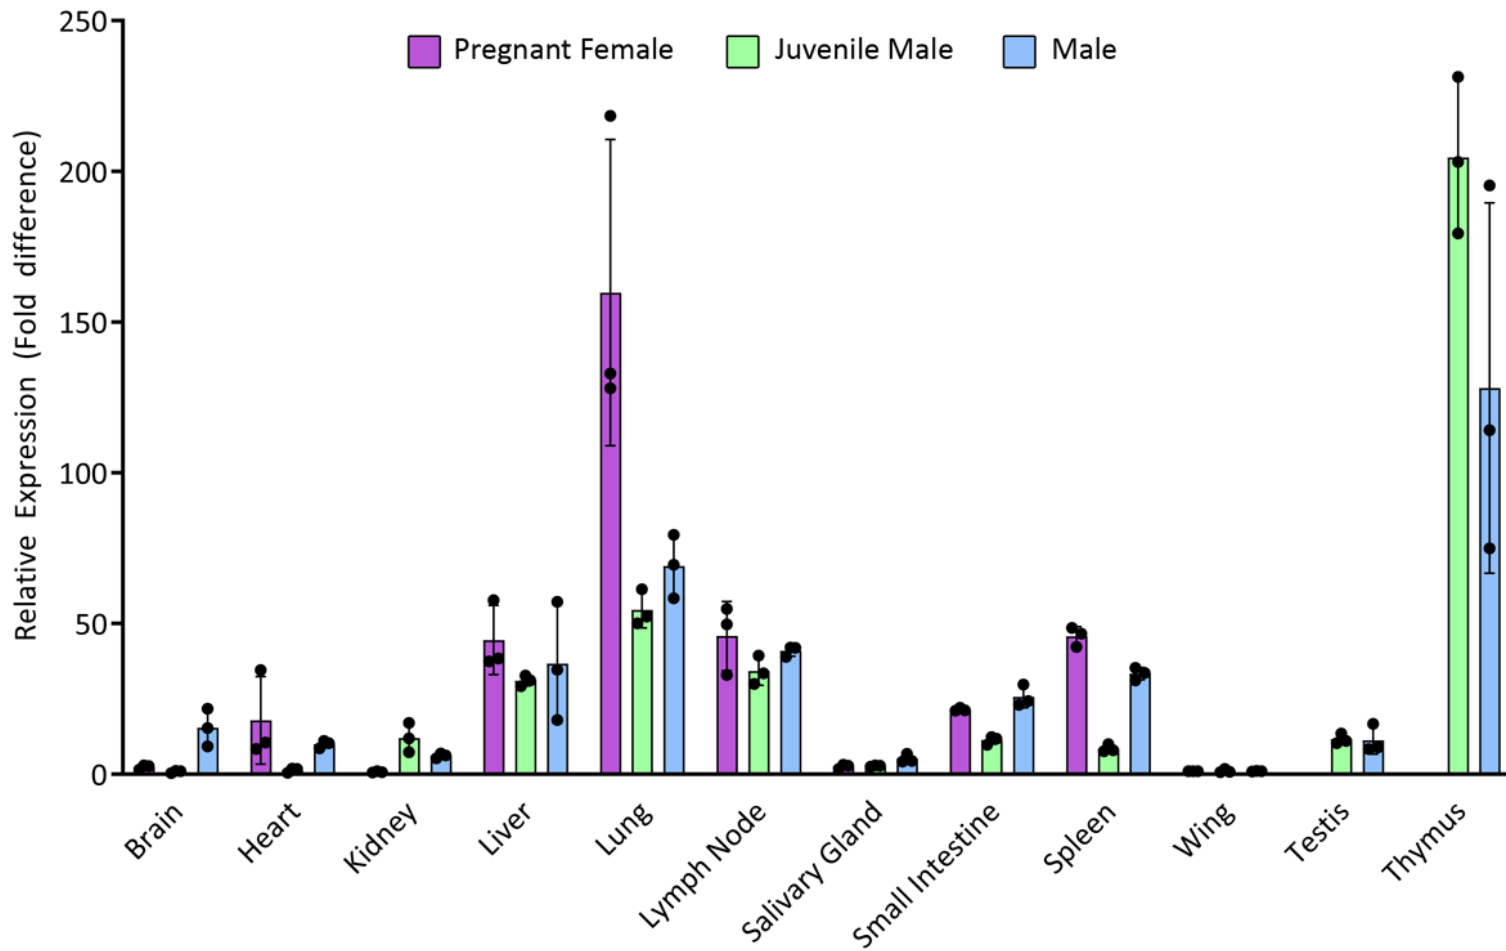

**Figure 7. Relative tetherin expression across tissues from *P. alecto*.** Expression of tetherin was assessed by qRT-PCR analysis for three bats, and calculated using the Livak/ $\Delta\Delta C_t$  method. In all cases, cycle threshold ( $C_t$ ) values for tetherin were normalised against expression of the 18S rRNA gene. For all individuals, relative tetherin expression in each tissue is calibrated against expression in wing tissue. Error bars represent the standard error (N = 3).

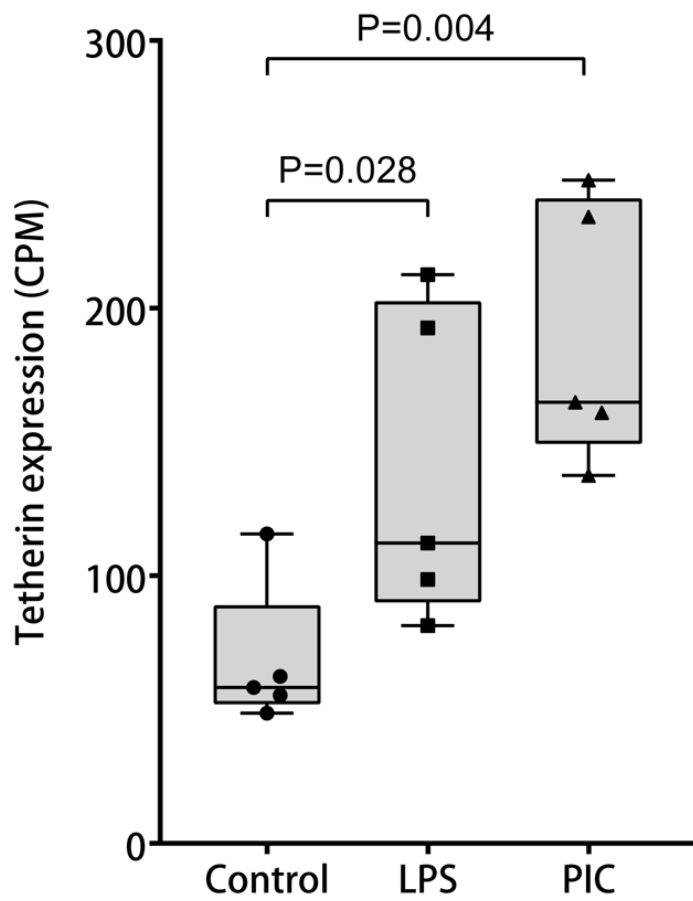

**Figure 8. Stimulated expression of tetherin from *P. alecto* spleen tissue.** Spleen tissue from 15 bats that were unstimulated (control), or stimulated with lipopolysaccharide (LPS) or polyinosinic:polycytidylic acid (PIC) (N = 5 for each treatment). Tetherin expression levels were from RNA-Seq data mapped against the *P. alecto* genomic scaffold, KB030270, which contains the tetherin gene. Expression levels are denoted as normalised counts-per-million (CPM) reads. P-values were determined using the one-tailed Mann-Whitney test.

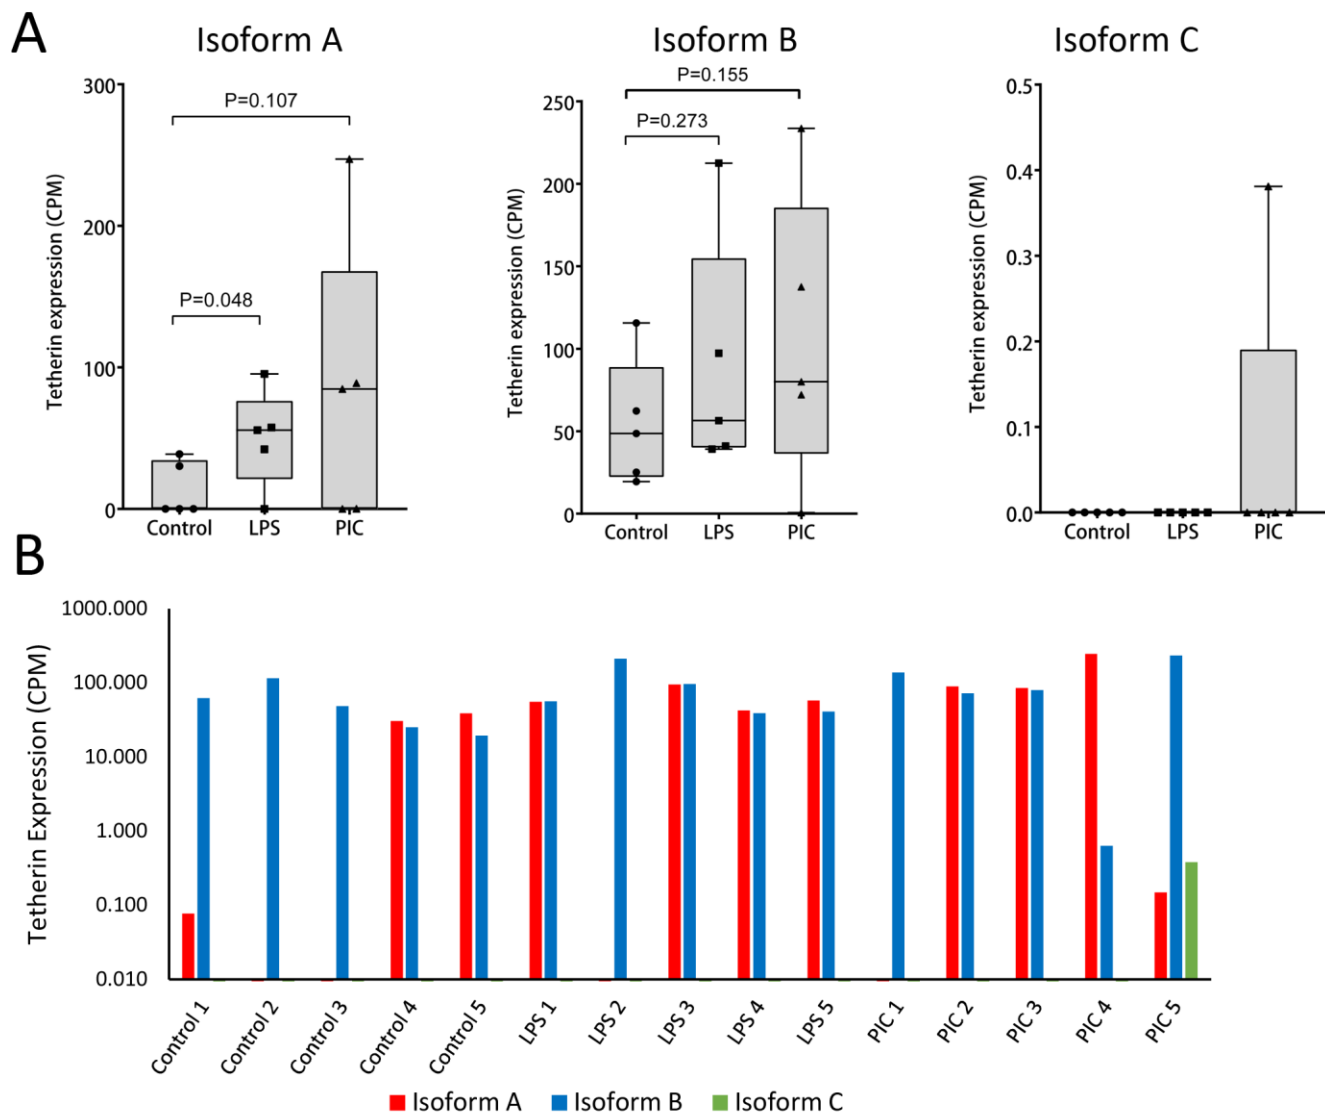

**Figure 9. Expression of alternative isoforms of tetherin in stimulated and unstimulated *P. alecto* spleen tissue.** Spleen tissue from 15 individuals were unstimulated, or stimulated with lipopolysaccharide (LPS) or polyinosinic:polycytidylic acid (PIC) (N = 5 for each treatment). Tetherin expression was determined from RNA-Seq sequence reads mapped against the *P. alecto* genomic scaffold, KB030270, which harbours the tetherin gene. Tetherin expression levels are represented as normalised counts-per-million (CPM) reads. **A.** Tetherin expression by isoform. P-values were determined using the one-tailed Mann-Whitney test. **B.** Expression of tetherin isoform in each individual sample.

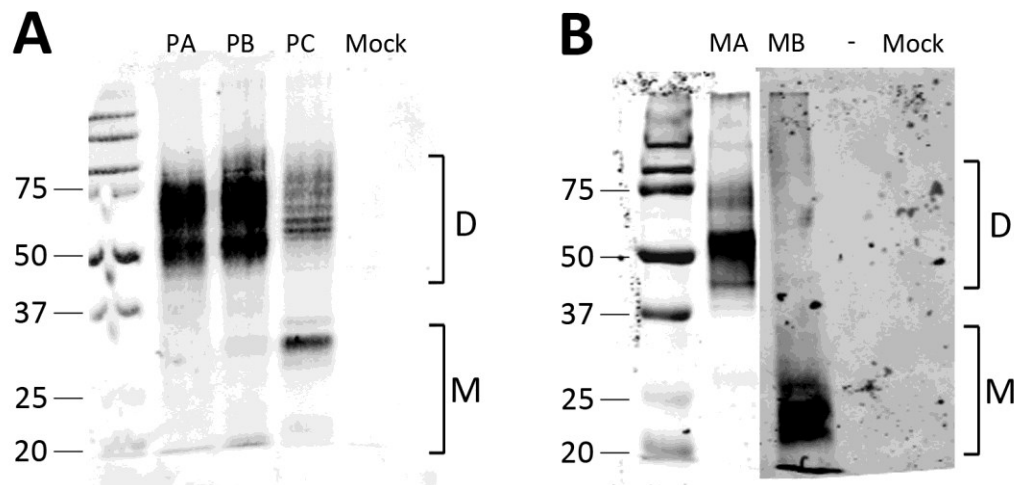

**Figure 10. SDS-PAGE and Western blot analysis of the expression of modified bat tetherin constructs.** **A.** Haemagglutinin (HA) tagged *P. alecto* tetherin isoforms A, B, and C (PA, PB, and PC, respectively). **B.** HA tagged *M. macropus* tetherin A and B (MA and MB, respectively). The left side of the membrane is displayed at low exposure while the right side is displayed at high exposure to enable clear images of the bands in each lane. Tetherin was expressed in mammalian HEK293T cells and cell lysates were collected 24 h after transfection of expression plasmids. Tetherin is present in dimeric (D) and monomeric (M) forms. Protein size scale is expressed in kDa.

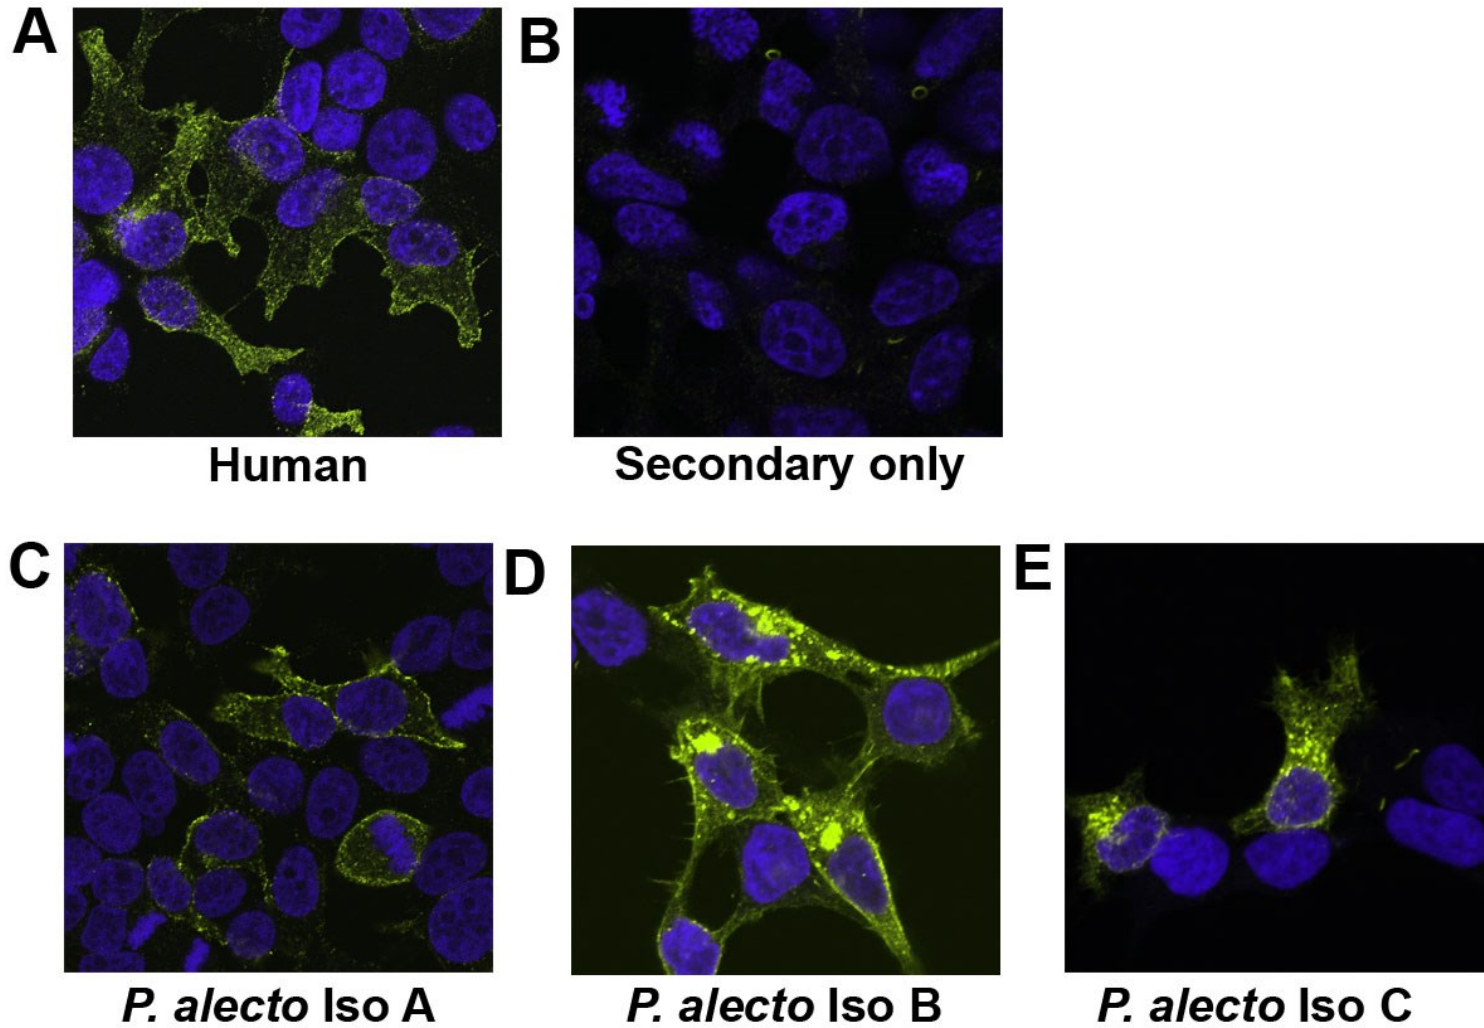

**Figure 11. Expression of HA-tagged tetherin proteins.** Human and *Pteropus alecto* tetherin isoforms A, B, and C in HEK293T cells. Tetherin localisation in cells was detected using anti-HA-tag rabbit monoclonal Ig and anti-rabbit AlexaFlour 488 secondary Ig. Nuclei are blue stained with Hoescht. Fixed and permeabilised cells were imaged on Nikon AR1 confocal microscope. **A.** Human I-tetherin, **B.** Negative control; HEK293T cells treated without the inclusion of the primary antibody, **C.** *P. alecto* tetherin isoform A, **D.** *P. alecto* tetherin isoform B, **E.** *P. alecto* tetherin isoform C. HA, haemagglutinin.



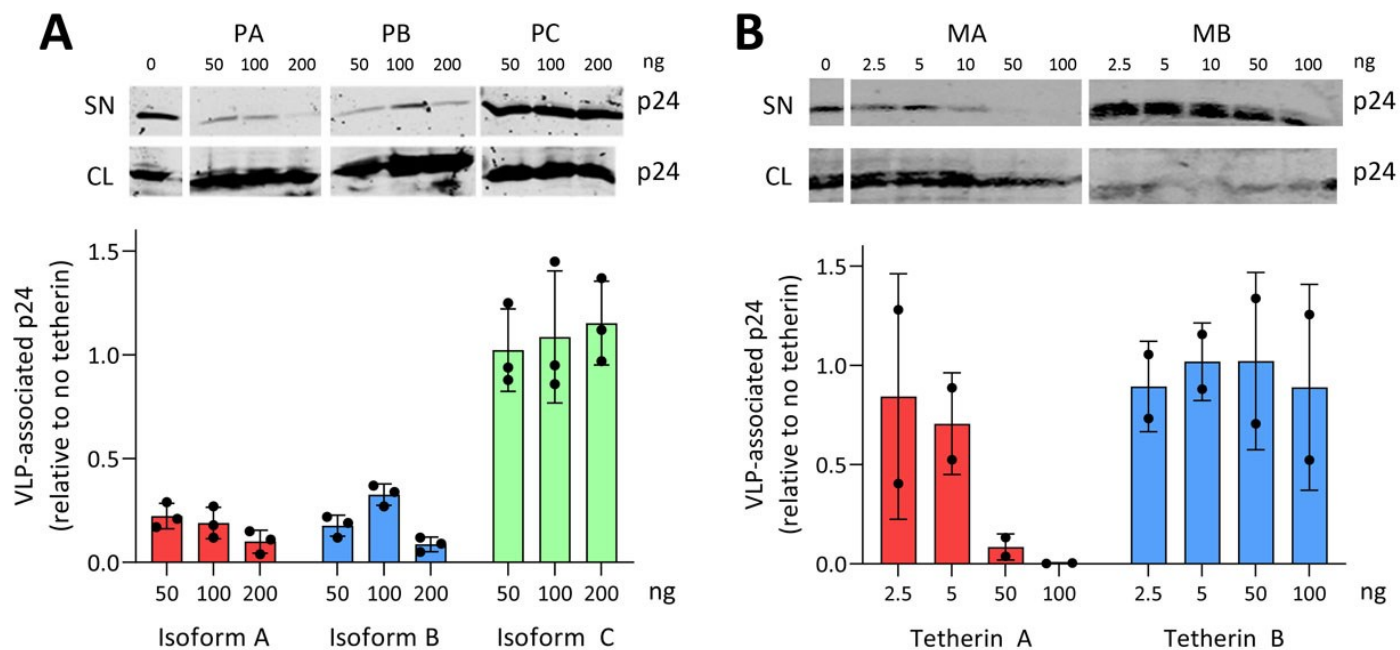

**Figure 12. Bat tetherin restricts the release of HIV-1 virus-like particles (VLPs).** **A.** *P. alecto* tetherin isoforms A (PA), B (PB), and C (PC), cotransfected with a HIVΔVpu construct. **B.** *M. macropus* tetherin A (MA) and tetherin B (MB) cotransfected with a HIVΔVpu construct. Mammalian HEK293T cells were cotransfected with 200 ng of the HIVΔVpu plasmid expression construct encoding the HIV Gag-Pol polyprotein, which generates HIV-1 VLPs that do not include the tetherin antagonist Vpu, and 0 – 200 ng of the tetherin plasmid expression vector. VLPs were harvested at 48 h and concentrated by ultracentrifugation using a sucrose cushion. VLP and cell lysates were subjected to SDS-PAGE and Western blot analysis. HIV-1 VLPs were detected with a mouse anti-p24 primary antibody and goat anti-mouse Alexa-Fluor 680 fluorophore-conjugated fluorescent secondary antibody. Representative Western blots are shown. The extent of VLP restriction was quantitated by densitometric analysis of Western blots comparing the relative ratios of VLPs present in the viral lysates and cell lysates from N=3 (*P. alecto*) or N=2 (*M. macropus*) independent assays. Error bars represent the standard deviation. HIV-1, human immunodeficiency virus type 1; SN, cell culture supernatant; CL, cell culture lysate.

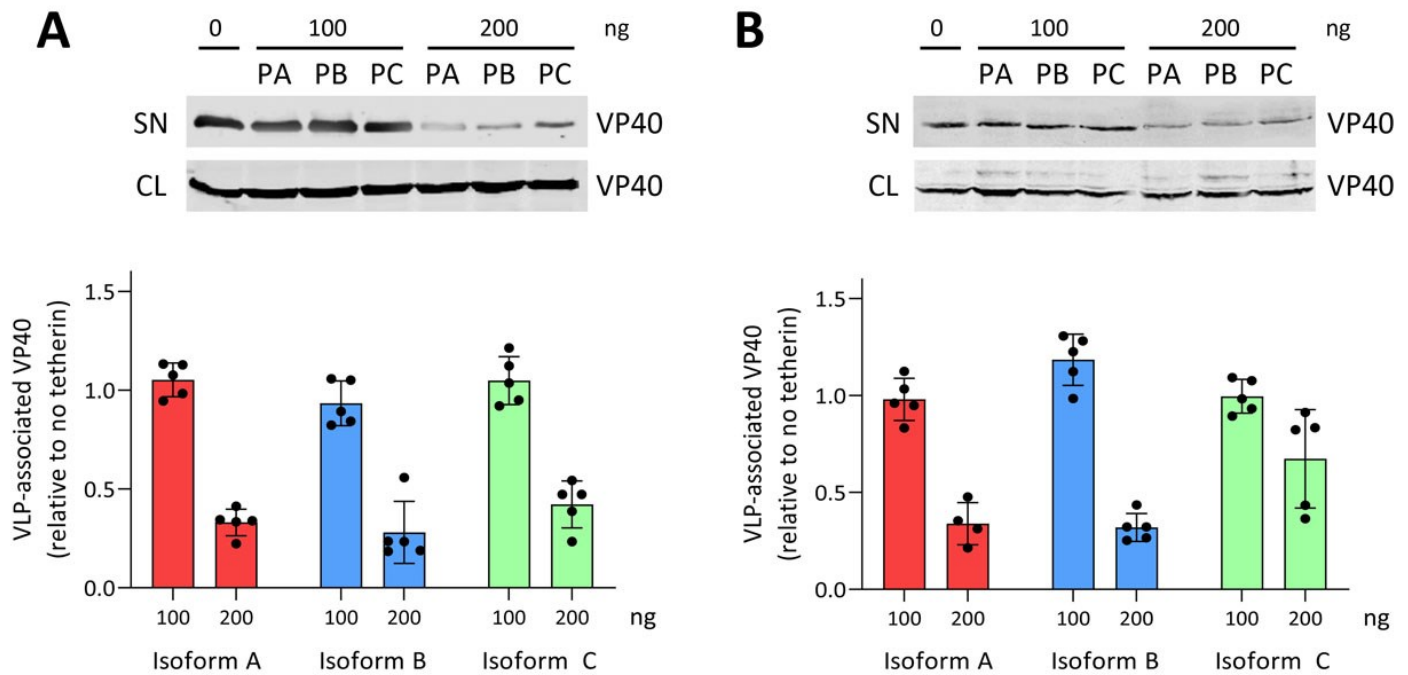

**Figure 13. *Pteropus alecto* tetherin restricts the release of Ebola and Marburg virus-like particles (VLPs).** *P. alecto* tetherin isoforms A (PA), B (PB), and C (PC), cotransfected with an **A**. Ebola virus construct or **B**. Marburg virus construct. Mammalian HEK293T cells were cotransfected with 200 ng of Ebola or Marburg virus plasmid expression construct encoding a VP40-eGFP protein which generates VLPs, and 0 – 200 ng of the tetherin plasmid expression vector. VLPs were harvested at 48 h and concentrated by ultracentrifugation through a sucrose gradient. VLP and cell lysates were subjected to SDS-PAGE and Western blot analysis. VLPs were detected with a mouse anti-GFP 4B10 primary antibody and a goat anti-mouse Alexa-Fluor 680 fluorophore-conjugated fluorescent secondary antibody. Representative Western blots are shown. The extent of VLP restriction was quantitated by densitometric analysis of Western blots comparing the relative ratios of VLPs present in the viral lysates and cell lysates from N = 5 independent assays. Error bars represent the standard deviation. The non-parametric Wilcoxon Rank Sum test was performed to calculate the statistical significance of the restriction of Ebola and Marburg VLPs in the 200 ng tetherin isoform C treatment groups;  $p = 0.008$  for both. SN, cell culture supernatant; CL, cell culture lysate.

**Table 1. Sequence accessions with BioProject and cDNA sources for the prediction and/or confirmation of tetherin homologues**

| Sequence             | Species                          | Common name                  | GenBank Accession | UniProt Identifier | NCBI Project Accession | cDNA source      |
|----------------------|----------------------------------|------------------------------|-------------------|--------------------|------------------------|------------------|
| <b>Bats</b>          |                                  |                              |                   |                    |                        |                  |
| Tetherin             | <i>Artibeus jamaicensis</i>      | Jamaican fruit-eating bat    | MT274379          | -                  | PRJNA61227             | -                |
| Tetherin             | <i>Carollia brevicauda</i>       | Silky short-tailed bat       | MT274380          | -                  | PRJNA139591            | -                |
| Tetherin             | <i>Carollia perspicillata</i>    | Seba's short-tailed bat      | MT274381          | -                  | PRJNA291081            | -                |
| Tetherin             | <i>Cynopterus sphinx</i>         | Indian short-nosed fruit bat | MT274382          | -                  | PRJNA222415            | -                |
| Tetherin             | <i>Desmodus rotundus</i>         | Common vampire bat           | MT274383          | -                  | PRJNA178123            | -                |
| Tetherin             | <i>Eidolon helvum</i>            | Straw-coloured fruit bat     | MT274384          | -                  | PRJNA209406            | -                |
| Tetherin             | <i>Eonycteris spelaea</i>        | Cave nectar bat              | MT274385          | -                  | PRJNA255191            | -                |
| Tetherin             | <i>Hipposideros armiger</i>      | Great roundleaf bat          | MT274386          | -                  | PRJNA260965            | -                |
| Tetherin             | <i>Macrotus californicus</i>     | California leaf-nosed bat    | MT274387          | -                  | PRJNA226078            | -                |
| Tetherin             | <i>Miniopterus natalensis</i>    | Natal long-fingered bat      | MT274388          | -                  | PRJNA270639            | -                |
| Tetherin             | <i>Miniopterus schreibersii</i>  | Common bent-wing bat         | MT274389          | -                  | PRJNA218524            | -                |
| Tetherin             | <i>Miniopterus schreibersii</i>  | Common bent-wing bat         | MT274405          | -                  | -                      | Kidney cell line |
| Tetherin             | <i>Murina leucogaster</i>        | Hilgendorf's tube-nosed bat  | MT274390          | -                  | PRJNA182766            | -                |
| Tetherin             | <i>Myotis brandtii</i>           | Brandt's bat                 | MT274391          | -                  | PRJNA218631            | -                |
| Tetherin             | <i>Myotis davidii</i>            | David's Myotis               | MT274392          | -                  | PRJNA172130            | -                |
| Tetherin             | <i>Myotis laniger</i>            | Chinese Water Myotis         | MT274393          | -                  | PRJNA255191            | -                |
| Tetherin             | <i>Myotis lucifugus</i>          | Little Brown Bat             | MT274394          | -                  | PRJNA246229            | -                |
| Tetherin A           | <i>Myotis macropus</i>           | Large-footed myotis          | MT274406          | -                  | -                      | Kidney cell line |
| Tetherin B           | <i>Myotis macropus</i>           | Large-footed myotis          | MT274407          | -                  | -                      | Kidney cell line |
| Tetherin C Isoform A | <i>Myotis macropus</i>           | Large-footed myotis          | MT274408          | -                  | -                      | Kidney cell line |
| Tetherin C Isoform B | <i>Myotis macropus</i>           | Large-footed myotis          | MT274409          | -                  | -                      | Kidney cell line |
| Tetherin D           | <i>Myotis macropus</i>           | Large-footed myotis          | MT274410          | -                  | -                      | Kidney cell line |
| Tetherin E           | <i>Myotis macropus</i>           | Large-footed myotis          | MT274411          | -                  | -                      | Kidney cell line |
| Tetherin             | <i>Myotis myotis</i>             | Greater mouse-eared bat      | MT274395          | -                  | PRJNA267654            | -                |
| Tetherin A           | <i>Myotis ricketti</i>           | Rickett's big-footed bat     | MT274396          | -                  | PRJNA198831            | -                |
| Tetherin A           | <i>Myotis ricketti</i>           | Rickett's big-footed bat     | MT274412          | -                  | -                      | Spleen tissue    |
| Tetherin B           | <i>Myotis ricketti</i>           | Rickett's big-footed bat     | MT274413          | -                  | -                      | Spleen tissue    |
| Tetherin Isoform A   | <i>Pteropus alecto</i>           | Black flying fox             | MT274397          | -                  | PRJNA73831             | -                |
| Tetherin Isoform A   | <i>Pteropus alecto</i>           | Black flying fox             | MT274414          | -                  | -                      | Spleen tissue    |
| Tetherin Isoform B   | <i>Pteropus alecto</i>           | Black flying fox             | MT274415          | -                  | -                      | Spleen tissue    |
| Tetherin Isoform C   | <i>Pteropus alecto</i>           | Black flying fox             | MT274416          | -                  | -                      | Spleen tissue    |
| Tetherin             | <i>Pteropus vampyrus</i>         | Large flying fox             | MT274398          | -                  | PRJNA20325             | -                |
| Tetherin             | <i>Rhinolophus ferrumequinum</i> | Greater horseshoe bat        | MT274399          | -                  | PRJNA231230            | -                |
| Tetherin             | <i>Rhinolophus macrotis</i>      | Big-eared horseshoe bat      | MT274400          | -                  | PRJNA261657            | -                |
| Tetherin             | <i>Rousettus aegyptiacus</i>     | Egyptian fruit bat           | MT274401          | -                  | PRJNA300284            | -                |
| Tetherin             | <i>Tadarida brasiliensis</i>     | Mexican free-tailed bat      | MT274402          | -                  | PRJNA184055            | -                |
| Tetherin             | <i>Taphozous melanopogon</i>     | Black-bearded tomb bat       | MT274403          | -                  | PRJNA255191            | -                |
| Tetherin             | <i>Uroderma bilobatum</i>        | Tent-making bat              | MT274404          | -                  | PRJNA268573            | -                |
| <b>Other mammals</b> |                                  |                              |                   |                    |                        |                  |
| Tetherin A Isoform A | <i>Bos taurus</i>                | Cow                          | -                 | J7M5G6             | -                      | -                |
| Tetherin A Isoform B | <i>Bos taurus</i>                | Cow                          | -                 | J7MAQ7             | -                      | -                |
| Tetherin B           | <i>Bos taurus</i>                | Cow                          | -                 | J7M2B2             | -                      | -                |
| Tetherin             | <i>Felis catus</i>               | Cat                          | -                 | F8R0X8             | -                      | -                |
| L-tetherin           | <i>Homo sapiens</i>              | Human                        | -                 | Q10589-1           | -                      | -                |
| S-tetherin           | <i>Homo sapiens</i>              | Human                        | -                 | Q10589-2           | -                      | -                |
| Tetherin             | <i>Loxodonta africana</i>        | Elephant                     | -                 | G3UKK9             | -                      | -                |
| Tetherin             | <i>Macaca mulatta</i>            | Rhesus Macaque               | -                 | C4P4A2             | -                      | -                |
| Tetherin             | <i>Mus musculus</i>              | Mouse                        | -                 | Q8R2Q8             | -                      | -                |
| Tetherin A           | <i>Ovis aries</i>                | Sheep                        | -                 | D5JZS7             | -                      | -                |
| Tetherin B           | <i>Ovis aries</i>                | Sheep                        | -                 | D5JZS8             | -                      | -                |
| Tetherin             | <i>Pan troglodytes</i>           | Chimpanzee                   | -                 | D7RVC2             | -                      | -                |

**Table 2. Evolutionary hotspots in bat tetherin**

| <b>Tetherin amino acid<sup>A</sup></b> | <b>dN/dS value</b> |
|----------------------------------------|--------------------|
| D24                                    | 2.668              |
| R25                                    | 2.626              |
| G29                                    | 2.668              |
| W30                                    | 2.660              |
| G32                                    | 2.680              |
| S43                                    | 2.680              |
| A45                                    | 2.672              |
| V46                                    | 2.636              |
| R63                                    | 2.679              |
| I71                                    | 2.671              |
| A105                                   | 2.641              |
| S151                                   | 2.664              |
| A171                                   | 2.678              |
| L179                                   | 2.651              |

<sup>A</sup>The consensus amino acid identity is indicated at the position number relative to the *Cynopterus sphinx* tetherin protein sequence.

**Table 3. cDNA amplification and vector sequencing primers for fruit bat and vesper bat tetherins.**

| <b>A</b>                                        |                         | <b>cDNA Amplification Primers</b> | <b>Primer sequence (5' &gt; 3')</b> | <b>Direction</b> | <b>Target region</b> | <b>Successful combinations</b> | <b>PCR T<sub>A</sub> °C</b> |
|-------------------------------------------------|-------------------------|-----------------------------------|-------------------------------------|------------------|----------------------|--------------------------------|-----------------------------|
| <i>Pteropus alecto</i>                          | <b>Tetherin</b>         | PaF1_JH_119                       | TCACTGCAAGGGGTTCTCTC                | Forward          | 5' UTR               | 119/121-2                      | 60                          |
|                                                 |                         | PaF2_JH_120                       | GGAAACTTCACTGCAAGGGG                | Forward          | 5' UTR               | 120/121-2                      | 60                          |
|                                                 |                         | PaR1_JH_121                       | CTTCTCCCAGCTTTGTTGCC                | Reverse          | 3' UTR               |                                |                             |
|                                                 |                         | PaR2_JH_122                       | CTCCTCTCCCCAAAATGTC                 | Reverse          | 3' UTR               |                                |                             |
| <i>Miniopterus schreibersii</i>                 | <b>Tetherin</b>         | MiniF1_JH_466                     | CCCACAACTCCCTACACCC                 | Forward          | 5' UTR               | 466/468                        | 60                          |
|                                                 |                         | MiniF2_JH_467                     | ATGCTAATGAAGGGGCGGGG                | Forward          | 5' UTR               | 466/469                        | 62                          |
|                                                 |                         | MiniR1_JH_468                     | CTGTCTGTCTTCTGGGAC                  | Reverse          | 3' UTR               | 467/469                        | 62                          |
|                                                 |                         | MiniR2_JH_469                     | GGACAGGTCAGGGAAACCAA                | Reverse          | 3' UTR               |                                |                             |
| <i>Myotis macropus</i> & <i>Myotis ricketti</i> | <b>Tetherin A, C, D</b> | MyoF1_JH_479                      | TCCACTGCATCCCTCTG                   | Forward          | 5' UTR               | 479/481-4                      | 60                          |
|                                                 |                         | MyoF2_JH_480                      | ATGGCACCCACTTTTTAC                  | Forward          | 5' UTR               | 480/481-4                      | 60                          |
|                                                 |                         | MyoR1_JH_481                      | TCAGCCAGGTTAGAATGTG                 | Reverse          | 3' UTR               |                                |                             |
|                                                 |                         | MyoR2_JH_482                      | TCCTTGGGCAAACAGCTCTC                | Reverse          | 3' UTR               |                                |                             |
|                                                 |                         | MyoR3_JH_483                      | CAGGAACTCTCAGAAAAG                  | Reverse          | 3' UTR               |                                |                             |
|                                                 |                         | MyoR4_JH_484                      | CATCTTTCCAAGACCACA                  | Reverse          | 3' UTR               |                                |                             |
|                                                 | <b>Tetherin</b>         | MyoF3_JH_474                      | GCTCCTGTGCATCCCTCTGG                | Forward          | 5' UTR               | 474/478                        | 60                          |
|                                                 |                         | MyoR5_JH_478                      | CCTGGTTAGAATGTGCTTT                 | Reverse          | 3' UTR               |                                |                             |

  

| <b>B</b> | <b>Sequencing Primers</b> | <b>Primer sequence (5' &gt; 3')</b> | <b>Direction</b> | <b>Target region</b>     |
|----------|---------------------------|-------------------------------------|------------------|--------------------------|
|          | M13F                      | GTAAAACGACGGCCAG                    | Forward          | pCR-Blunt-II-TOPO vector |
|          | M13R                      | CAGGAAACAGCTATGAC                   | Reverse          | pCR-Blunt-II-TOPO vector |
|          | T7F                       | TAATACGACTCACTATAGGG                | Forward          | pcDNA3.1 vector          |
|          | BGHR                      | TAGAAGGCACAGTCGAGG                  | Reverse          | pcDNA3.1 vector          |

  

| <b>C</b>        | <b>qPCR Primers</b> | <b>Primer sequence (5' &gt; 3')</b>     | <b>Direction</b> |
|-----------------|---------------------|-----------------------------------------|------------------|
| <b>Tetherin</b> | Teth_F              | TGACTGTGGCCGTGATCGT                     | Forward          |
|                 | Teth_R              | CCATTTTTGCAGGCCTCACT                    | Reverse          |
| <b>18S rRNA</b> | 18S_rRNA_F          | CGGCTACCACATCCAAGGAA                    | Forward          |
|                 | 18S_rRNA_R          | GCTGGAATTACCGCGGCT                      | Reverse          |
|                 | <b>qPCR Probes</b>  | <b>Probe sequence (5' &gt; 3')</b>      |                  |
| <b>Tetherin</b> | Teth_Probe          | <i>FAM_TCGCCGTCGAGAACA_MGB</i>          |                  |
| <b>18S rRNA</b> | 18S_Probe           | <i>VIC_TGCTGGCACCAGACTTGCCCTC_TAMRA</i> |                  |

**A** Primers used to amplify tetherin homologues from cDNA generated from *Myotis macropus*, *M. ricketti*, and *Miniopterus schreibersii*. Combinations of forward and reverse primers identified as capable of amplifying tetherin are indicated alongside the highest annealing temperature at which amplification was successful. **B** The sequencing primers used to confirm the sequence of tetherin clones and modified tetherin constructs inserted into plasmid vectors are listed. **C** The qPCR primers and probes used to analyse tetherin expression in bat tissues are listed. Probe 5' reporters and 3' quenchers are indicated with italics. UTR, untranslated region; PCR, polymerase chain reaction; T<sub>A</sub> °C, primer annealing temperature.

**Table 4. Primers used for the generation of haemagglutinin-tagged *Pteropus alecto* and *Myotis macropus* tetherin expression constructs through a 2-Step PCR process.**

| <i>Pteropus alecto</i>   | Construct name   | 2 Step PCR usage | Primer name       | Primer sequence (5' > 3')                                 | Direction | Encoded RE site | Encoded Epitope |                   |                  |                 |                |                                                         |         |               |    |
|--------------------------|------------------|------------------|-------------------|-----------------------------------------------------------|-----------|-----------------|-----------------|-------------------|------------------|-----------------|----------------|---------------------------------------------------------|---------|---------------|----|
| <b>Tetherin Isomer A</b> | <b>pD-PaTAH1</b> | Step 1, 5' half  | TethXF_JH_353     | CTCTCTCGAGAGCTTCTTCTCCTGACTCC                             | Forward   | <i>Xho</i> I    | -               |                   |                  |                 |                |                                                         |         |               |    |
|                          |                  |                  | TethAB-HA1_JH_355 | CGTATGGGTACCCGCTGGCATGCTCTTTCCTTAGCTG                     | Reverse   | -               | HA              |                   |                  |                 |                |                                                         |         |               |    |
|                          |                  | Step 1, 3' half  | TethAB-HA2_JH_356 | CAGCGGGTACCCATACGATGTTCCAGATTACGCTGGCAGCTCTGGCGAGAAAAATGG | Forward   | -               | HA              |                   |                  |                 |                |                                                         |         |               |    |
|                          |                  |                  | TethXR_JH_354     | TTTTTCTAGAATGTTTCTCCACCCTAAGGC                            | Reverse   | <i>Xba</i> I    | -               |                   |                  |                 |                |                                                         |         |               |    |
|                          |                  | Step 2           | TethXF_JH_353     | CTCTCTCGAGAGCTTCTTCTCCTGACTCC                             | Forward   | <i>Xho</i> I    | -               |                   |                  |                 |                |                                                         |         |               |    |
|                          |                  |                  | TethXR_JH_354     | TTTTTCTAGAATGTTTCTCCACCCTAAGGC                            | Reverse   | <i>Xba</i> I    | -               |                   |                  |                 |                |                                                         |         |               |    |
| <b>Tetherin Isomer B</b> | <b>pD-PaTBH1</b> | Step 1, 5' half  | TethXF_JH_353     | CTCTCTCGAGAGCTTCTTCTCCTGACTCC                             | Forward   | <i>Xho</i> I    | -               |                   |                  |                 |                |                                                         |         |               |    |
|                          |                  |                  | TethAB-HA1_JH_355 | CGTATGGGTACCCGCTGGCATGCTCTTTCCTTAGCTG                     | Reverse   | -               | HA              |                   |                  |                 |                |                                                         |         |               |    |
|                          |                  | Step 1, 3' half  | TethAB-HA2_JH_356 | CAGCGGGTACCCATACGATGTTCCAGATTACGCTGGCAGCTCTGGCGAGAAAAATGG | Forward   | -               | HA              |                   |                  |                 |                |                                                         |         |               |    |
|                          |                  |                  | TethXR_JH_354     | TTTTTCTAGAATGTTTCTCCACCCTAAGGC                            | Reverse   | <i>Xba</i> I    | -               |                   |                  |                 |                |                                                         |         |               |    |
|                          |                  | Step 2           | TethXF_JH_353     | CTCTCTCGAGAGCTTCTTCTCCTGACTCC                             | Forward   | <i>Xho</i> I    | -               |                   |                  |                 |                |                                                         |         |               |    |
|                          |                  |                  | TethXR_JH_354     | TTTTTCTAGAATGTTTCTCCACCCTAAGGC                            | Reverse   | <i>Xba</i> I    | -               |                   |                  |                 |                |                                                         |         |               |    |
| <b>Tetherin Isomer C</b> | <b>pD-PaTCH1</b> | Step 1, 5' half  | TethXF_JH_353     | CTCTCTCGAGAGCTTCTTCTCCTGACTCC                             | Forward   | <i>Xho</i> I    | -               |                   |                  |                 |                |                                                         |         |               |    |
|                          |                  |                  | TethC-HA1_JH_359  | TATGGGTACCCGCTCCTTAGCTGTTCCGGTCCG                         | Reverse   | -               | HA              |                   |                  |                 |                |                                                         |         |               |    |
|                          |                  | Step 1, 3' half  | TethC-HA2_JH_360  | AGCGGGTACCCATACGATGTTCCAGATTACGCTGGCAGCCACAACCTGGACTGGTCC | Forward   | -               | HA              |                   |                  |                 |                |                                                         |         |               |    |
|                          |                  |                  | TethXR_JH_354     | TTTTTCTAGAATGTTTCTCCACCCTAAGGC                            | Reverse   | <i>Xba</i> I    | -               |                   |                  |                 |                |                                                         |         |               |    |
|                          |                  | Step 2           | TethXF_JH_353     | CTCTCTCGAGAGCTTCTTCTCCTGACTCC                             | Forward   | <i>Xho</i> I    | -               |                   |                  |                 |                |                                                         |         |               |    |
|                          |                  |                  | TethXR_JH_354     | TTTTTCTAGAATGTTTCTCCACCCTAAGGC                            | Reverse   | <i>Xba</i> I    | -               |                   |                  |                 |                |                                                         |         |               |    |
| <i>Myotis macropus</i>   | Construct name   | 2 Step PCR usage | Primer name       | Primer sequence (5' > 3')                                 | Direction | Encoded RE site | Encoded Epitope |                   |                  |                 |                |                                                         |         |               |    |
|                          |                  |                  |                   |                                                           |           |                 |                 | <b>Tetherin A</b> | <b>pD-MmTAH1</b> | Step 1, 5' half | MmacXF1_JH_510 | CTGCAGAATTCGCCCTTATG                                    | Forward | <i>Eco</i> RI | -  |
|                          |                  |                  |                   |                                                           |           |                 |                 |                   |                  |                 | MmacAH1_JH_512 | GGGACGTCGTATGGGTATGGGTATGGCCGGCCGACCAAGGCCTCATTCTC      | Reverse | -             | HA |
|                          |                  |                  |                   |                                                           |           |                 |                 |                   |                  | Step 1, 3' half | MmacAH2_JH_513 | TACCCATACGACGTCCCAGACTACGCTGCTAGCTCTGCCAAGGGTCCCC       | Forward | -             | HA |
|                          |                  |                  |                   |                                                           |           |                 |                 |                   |                  |                 | MmacXR1_JH_511 | CAGTGTGCTGGAATTCGCC                                     | Reverse | <i>Eco</i> RI | -  |
|                          |                  |                  |                   |                                                           |           |                 |                 |                   |                  | Step 2          | MmacXF1_JH_510 | CTGCAGAATTCGCCCTTATG                                    | Forward | <i>Eco</i> RI | -  |
|                          |                  |                  |                   |                                                           |           |                 |                 |                   |                  |                 | MmacXR1_JH_511 | CAGTGTGCTGGAATTCGCC                                     | Reverse | <i>Eco</i> RI | -  |
|                          |                  |                  |                   |                                                           |           |                 |                 | <b>Tetherin B</b> | <b>pD-MmTBH1</b> | Step 1, 5' half | MmacXF2_JH_516 | CTGCAGAATTCGCCCTTTC                                     | Forward | <i>Eco</i> RI | -  |
|                          |                  |                  |                   |                                                           |           |                 |                 |                   |                  |                 | MmacBH1_JH_518 | CTGGGACGTCGTATGGGTATGGGTATGGCCGGCCGTTGGGGTCTTGCCTGAACAC | Reverse | -             | HA |
|                          |                  |                  |                   |                                                           |           |                 |                 |                   |                  | Step 1, 3' half | MmacBH2_JH_519 | CCCATACGACGTCCCAGACTACGCTGCTAGCAATGGCAAGGGCTTCCCTAAC    | Forward | -             | HA |
|                          |                  |                  |                   |                                                           |           |                 |                 |                   |                  |                 | MmacXR2_JH_517 | CAGTGTGCTGGAATTCGCC                                     | Reverse | <i>Eco</i> RI | -  |
|                          |                  |                  |                   |                                                           |           |                 |                 |                   |                  | Step 2          | MmacXF2_JH_516 | CTGCAGAATTCGCCCTTTC                                     | Forward | <i>Eco</i> RI | -  |
|                          |                  |                  |                   |                                                           |           |                 |                 |                   |                  |                 | MmacXR2_JH_517 | CAGTGTGCTGGAATTCGCC                                     | Reverse | <i>Eco</i> RI | -  |

HA, haemagglutinin; PCR, polymerase chain reaction
